# Supplementary material for: Donkey milk inhibits triple-negative breast tumor progression and is associated with increased cleaved-caspase-3 expression
Source: Royal Society of Chemistry journal article supplement (doi:10.1039/c9fo02934f), 2020-01-01
Supplement: c9fo02934f2.pdf [file c9fo02934f2.pdf]

| Table S1                                |             |          |             |             |             |             |             |             |             |             |             |             |             |             |             |             |          |  |  |
|-----------------------------------------|-------------|----------|-------------|-------------|-------------|-------------|-------------|-------------|-------------|-------------|-------------|-------------|-------------|-------------|-------------|-------------|----------|--|--|
| Name                                    | mz          | rt       | DC1         | DC2         | DC3         | DC4         | DC5         | DC6         | DM1         | DM2         | DM3         | DM4         | DM5         | DM6         | P value     | FC          | VIP      |  |  |
| Hippuric acid                           | 381.1010139 | 278.125  | 0.003901335 | 0.01130023  | 0.001445182 | 0.007091207 | 0.00764361  | 0.009493798 | 0.05235691  | 0.043608827 | 0.042964654 | 0.029362853 | 0.049307034 | 0.065326715 | 1.25E-05    | 0.144473179 | 1.30011  |  |  |
| Adifoline                               | 524.0542757 | 426.167  | 0.006820395 | 0.006951819 | 0.005228    | 0.00670809  | 0.005594352 | 0.005842434 | 0.00148811  | 0.003983554 | 0.002299154 | 0.003882631 | 0.002760473 | 0.002252362 | 4.57E-05    | 2.228756572 | 1.25209  |  |  |
| Pro-Ser                                 | 203.1020278 | 279.0265 | 0.018471672 | 0.014103015 | 0.014240885 | 0.019545407 | 0.012643871 | 0.003988546 | 0.001264383 | 0.003140383 | 0.00817053  | 0.003827777 | 0.003992259 | 0.003822707 | 6.36E-05    | 3.108537718 | 1.31247  |  |  |
| PA(16:0/16:0)                           | 649.4694617 | 144.117  | 0.007367572 | 0.017166454 | 0.013748423 | 0.011804777 | 0.009976204 | 0.013425763 | 0.002457619 | 0.002857656 | 0.000511591 | 0.006172812 | 0.002453002 | 0.002455674 | 0.000131181 | 4.346324486 | 1.21916  |  |  |
| PC(20:5/14:0)                           | 780.4910353 | 104.73   | 0.009926231 | 0.010041923 | 0.008357255 | 0.008910259 | 0.010284637 | 0.01122833  | 0.004927333 | 0.007017214 | 0.007312254 | 0.00705001  | 0.006288117 | 0.006651023 | 0.000143122 | 1.496934932 | 1.23679  |  |  |
| L-Glutamine                             | 147.0757876 | 385.079  | 0.059108156 | 0.081632932 | 0.055147218 | 0.075913476 | 0.081654748 | 0.073276448 | 0.037696614 | 0.034015048 | 0.043114904 | 0.050794663 | 0.032543902 | 0.039374038 | 0.000161071 | 1.796474155 | 1.37401  |  |  |
| CDP-DG(40:3)                            | 1061.236373 | 475.004  | 0.002280347 | 0.002579039 | 0.001847799 | 0.001594292 | 0.002862442 | 0.001659711 | 0.000574388 | 0.000201833 | 0.00052002  | 0.001338052 | 0.0002364   | 0.000438777 | 0.000161157 | 3.8748289   | 1.37242  |  |  |
| l-Aminocyclohexanecarboxylic acid       | 144.1017545 | 264.0285 | 0.633752272 | 0.632565072 | 0.43312606  | 0.448487625 | 0.638623022 | 0.610606899 | 0.191624461 | 0.32122072  | 0.260441171 | 0.411449796 | 0.249019132 | 0.208119048 | 0.000216344 | 2.069074893 | 1.31187  |  |  |
| N-Acetyl-leucyl-leucine                 | 309.1778233 | 263.61   | 0.021068029 | 0.015869827 | 0.009915622 | 0.01323771  | 0.015114577 | 0.014681715 | 0.000862031 | 0.004039145 | 0.00387156  | 0.00981957  | 0.003680543 | 0.002518926 | 0.000227434 | 3.625697636 | 1.25979  |  |  |
| L-Pyroglutamic acid                     | 276.1187826 | 420.4625 | 0.146874806 | 0.147309122 | 0.057899785 | 0.157025996 | 0.134183313 | 0.122636803 | 0.026036042 | 0.018594326 | 0.048824551 | 0.066138434 | 0.029400076 | 0.028343091 | 0.000242572 | 3.524165313 | 1.36261  |  |  |
| Ala-Gly                                 | 129.0651809 | 93.082   | 0.007228598 | 0.007228598 | 0.004746567 | 0.007009633 | 0.004793888 | 0.006583482 | 0.00288965  | 0.003294025 | 0.002774462 | 0.00447043  | 0.002603478 | 0.003579107 | 0.000234722 | 1.920398812 | 1.32933  |  |  |
| PEP-16:0/18:1)                          | 647.0787435 | 450.4115 | 0.012454228 | 0.01507229  | 0.011752887 | 0.015526903 | 0.014846589 | 0.014046229 | 0.008488413 | 0.009270068 | 0.009996121 | 0.011975086 | 0.009302248 | 0.008563197 | 0.000329273 | 1.453232619 | 1.35535  |  |  |
| Pro-Val                                 | 214.1292355 | 318.961  | 0.016556811 | 0.040515181 | 0.024175882 | 0.039411026 | 0.04449402  | 0.033940042 | 0.009820687 | 0.003693868 | 0.008958012 | 0.017335078 | 0.005637462 | 0.007052303 | 0.000471902 | 3.792433989 | 1.35202  |  |  |
| L-Leucine                               | 132.1011903 | 342.731  | 2.098785569 | 3.130964781 | 1.946803093 | 2.812048075 | 3.158367373 | 1.951491486 | 0.002905679 | 0.004672046 | 1.485594387 | 1.491059957 | 0.281305617 | 0.83227072  | 0.000569758 | 3.684520817 | 1.00984  |  |  |
| Lys-Gly                                 | 242.0926328 | 284.3615 | 0.003439023 | 0.005537651 | 0.0043419   | 0.005636607 | 0.007770573 | 0.004743074 | 0.002262957 | 0.002217509 | 0.001895073 | 0.002968132 | 0.001905726 | 0.001784754 | 0.000626766 | 2.418155994 | 1.32549  |  |  |
| DG(24:0/22:1/0:0)                       | 1121.32724  | 392.93   | 0.001359548 | 0.001662106 | 0.001751027 | 0.001772207 | 0.001756522 | 0.001158442 | 0.000390517 | 0.000935852 | 0.001107998 | 0.001058381 | 0.000833526 | 0.000774179 | 0.000641337 | 1.854708199 | 1.1259   |  |  |
| Viloxazine                              | 202.1182098 | 322.58   | 0.014091706 | 0.012977664 | 0.006771545 | 0.009249753 | 0.016717185 | 0.012151021 | 0.003346314 | 0.002263423 | 0.005808499 | 0.007057719 | 0.00282719  | 0.003452863 | 0.000709487 | 2.906723653 | 1.34204  |  |  |
| l-Methylnicotinamide                    | 137.0706647 | 308.6815 | 0.126896357 | 0.176509663 | 0.057156782 | 0.115860094 | 0.182707235 | 0.100292791 | 0.031455368 | 0.021075417 | 0.014368983 | 0.065799037 | 0.019861814 | 0.025272015 | 0.000899379 | 4.270436224 | 1.34806  |  |  |
| N-Acetylputrescine                      | 131.1172571 | 332.102  | 0.007472568 | 0.00676651  | 0.003143777 | 0.005001236 | 0.007315249 | 0.006369468 | 0.002448402 | 0.001154195 | 0.001478796 | 0.004430597 | 0.001251976 | 0.001753872 | 0.000918963 | 2.881392777 | 1.34201  |  |  |
| Adenosine 3',5'-cyclic phosphate (cAMP) | 330.0567524 | 340.459  | 0.001652273 | 0.003932737 | 0.003827368 | 0.002938876 | 0.004080473 | 0.003685464 | 0.001565782 | 0.001384557 | 0.001448581 | 0.001986607 | 0.001534803 | 0.001389375 | 0.00092085  | 2.16088383  | 1.21986  |  |  |
| N-Acetyl-D-glucosamine                  | 222.0966399 | 250.9345 | 0.032995084 | 0.069553829 | 0.045801767 | 0.050856287 | 0.068371458 | 0.056863562 | 0.020557407 | 0.016190206 | 0.031652148 | 0.034863508 | 0.016987474 | 0.025513693 | 0.001030272 | 2.225796607 | 1.30845  |  |  |
| L-Histidine                             | 156.0764886 | 370.579  | 0.206016095 | 0.25724089  | 0.116493929 | 0.210852767 | 0.247030895 | 0.201702527 | 0.056069194 | 0.070030957 | 0.130006248 | 0.144878022 | 0.075902424 | 0.074651404 | 0.001037549 | 2.247055585 | 1.30501  |  |  |
| l-Deoxynojirimycin                      | 164.0908815 | 356.285  | 0.010973187 | 0.016807588 | 0.015411949 | 0.013892811 | 0.020223977 | 0.013367511 | 0.000922756 | 0.004365718 | 0.011369824 | 0.009555833 | 0.004581754 | 0.003615646 | 0.001073723 | 2.635076684 | 1.10941  |  |  |
| CerP(d18:0/16:0)                        | 695.1918529 | 364.0995 | 0.028933162 | 0.029397618 | 0.015603538 | 0.019890636 | 0.024380481 | 0.021564574 | 0.01261095  | 0.00962823  | 0.012224888 | 0.017202022 | 0.010573745 | 0.011344471 | 0.001117666 | 1.899454063 | 1.33499  |  |  |
| Tyr-Ser                                 | 310.1333876 | 259.812  | 0.006567928 | 0.005563502 | 0.004696104 | 0.005573358 | 0.005035778 | 0.006724056 | 0.001529375 | 0.003827076 | 0.003739522 | 0.004455815 | 0.003389138 | 0.003031665 | 0.001151913 | 1.710380291 | 1.11245  |  |  |
| Hypotaaurine                            | 110.0266517 | 333.4645 | 0.005071124 | 0.003048138 | 0.001679302 | 0.003788923 | 0.00283226  | 0.00293797  | 0.001235123 | 0.000540573 | 0.000797796 | 0.001889481 | 0.000669314 | 0.003070571 | 0.001224852 | 3.315791538 | 1.36784  |  |  |
| DG(14:0/20:3/0:0)                       | 177.1014593 | 229.2445 | 0.011214547 | 0.017347395 | 0.009562299 | 0.011689919 | 0.018120159 | 0.013004513 | 0.006484577 | 0.006083247 | 0.006680165 | 0.009912294 | 0.005639199 | 0.00456095  | 0.001482275 | 2.056350195 | 1.3294   |  |  |
| Uridine 5'-diphosphate (UDP)            | 422.0364934 | 434.8115 | 0.067537144 | 0.065539609 | 0.014841083 | 0.036802378 | 0.053127314 | 0.051852058 | 0.007259391 | 0.002730121 | 0.003647451 | 0.029847801 | 0.00449453  | 0.004967721 | 0.001500839 | 5.471499876 | 1.35246  |  |  |
| Acetylcarnitine                         | 227.1137673 | 332.776  | 0.026417127 | 0.009461766 | 0.011955729 | 0.026388393 | 0.015620418 | 0.013932331 | 0.003174296 | 0.000743152 | 0.004135471 | 0.008252404 | 0.00192041  | 0.004020948 | 0.001624052 | 4.664775119 | 1.32127  |  |  |
| Zidovudine                              | 328.1230912 | 241.656  | 0.074312347 | 0.061576162 | 0.090855883 | 0.081320438 | 0.060402122 | 0.052709987 | 0.034787838 | 0.049411966 | 0.027171187 | 0.051131785 | 0.04406827  | 0.031428531 | 0.001649719 | 1.769654149 | 1.19138  |  |  |
| CE(14:0)                                | 635.509131  | 158.093  | 0.007137312 | 0.024480621 | 0.033683846 | 0.01888375  | 0.020392777 | 0.017021236 | 0.001411652 | 0.001803351 | 0.00682545  | 0.009087817 | 0.002511984 | 0.003191093 | 0.001673066 | 4.897017548 | 1.2697   |  |  |
| Ornithine                               | 196.106914  | 247.2155 | 0.024128709 | 0.007040557 | 0.021676924 | 0.01397033  | 0.014847808 | 0.013590327 | 0.001845388 | 0.001262929 | 0.005761098 | 0.009624785 | 0.002355702 | 0.001868988 | 0.001709176 | 4.192751274 | 1.32175  |  |  |
| D-Ornithine                             | 174.1232317 | 304.2815 | 0.107857482 | 0.27279902  | 0.065641012 | 0.239761302 | 0.272696842 | 0.167445404 | 0.014412817 | 0.010366931 | 0.02842771  | 0.084572241 | 0.015456318 | 0.01544098  | 0.001767174 | 6.676672469 | 1.37991  |  |  |
| Etomidate                               | 244.1146266 | 247.165  | 0.19405417  | 0.404176402 | 0.276852895 | 0.286501153 | 0.442884375 | 0.27230116  | 0.128773791 | 0.000650173 | 0.171782277 | 0.185338609 | 0.043336537 | 0.131128728 | 0.0018168   | 2.839245743 | 0.926373 |  |  |
| N-Acetyl-D-galactosamine                | 336.0876275 | 380.238  | 0.018605906 | 0.021711743 | 0.014649901 | 0.01760709  | 0.021968457 | 0.020367291 | 0.008014232 | 0.01494339  | 0.010073583 | 0.014040068 | 0.012471575 | 0.014714973 | 0.001829481 | 1.547451655 | 1.08896  |  |  |
| D-Glucosaminide                         | 226.9872881 | 351.3835 | 0.036332689 | 0.073239336 | 0.037300773 | 0.049248454 | 0.055194892 | 0.047214598 | 0.023788576 | 0.020954752 | 0.023895773 | 0.035846994 | 0.020665974 | 0.023250267 | 0.001924392 | 2.011631016 | 1.34593  |  |  |
| Theophylline                            | 244.078361  | 250.732  | 0.198538083 | 0.325368315 | 0.276705855 | 0.416260491 | 0.295643822 | 0.213146984 | 0.157960829 | 0.093645345 | 0.164030728 | 0.191113571 | 0.099599235 | 0.117893966 | 0.001990508 | 2.09363275  | 1.28758  |  |  |
| L-Citrulline                            | 176.1024899 | 384.0735 | 0.218074025 | 0.214102004 | 0.098932787 | 0.208911756 | 0.227424355 | 0.172790771 | 0.061313332 | 0.095537898 | 0.108266091 | 0.144661356 | 0.0813117   | 0.071990006 | 0.002014711 | 2.02499631  | 1.25273  |  |  |
| Anthranilic acid                        | 138.0547861 | 250.483  | 0.024821556 | 0.047179705 | 0.027046874 | 0.046358993 | 0.031616533 | 0.029277928 | 0.012445436 | 0.009301404 | 0.022887041 | 0.022177386 | 0.01072379  | 0.013328982 | 0.002136058 | 2.270442645 | 1.30597  |  |  |
| Val-Val                                 | 216.1437598 | 312.941  | 0.010923441 | 0.001202922 | 0.031948429 | 0.023645617 | 0.009288    | 0.015638937 | 0.030625573 | 0.072314101 | 0.056743053 | 0.033469332 | 0.045791986 | 0.044025809 | 0.002153333 | 0.327411364 | 1.0581   |  |  |
| DG(22:2n6/0:0/22:5n3)                   | 613.1567515 | 480.569  | 0.013150181 | 0.018513412 | 0.009503244 | 0.024391246 | 0.01434255  | 0.015632971 | 0.008047893 | 0.007307992 | 0.005634823 | 0.008872644 | 0.007237968 | 0.000818478 | 0.002195779 | 2.241491959 | 1.26071  |  |  |
| PE(P-18:1(9Z)/16:1)                     | 704.9786163 | 400.307  | 0.002349423 | 0.003217198 | 0.002400625 | 0.003046302 | 0.003147448 | 0.0023752   | 0.001846003 | 0.001485208 | 0.00226701  | 0.002158068 | 0.001441088 | 0.001019056 | 0.002275951 |             |          |  |  |

|                                               |             |          |             |             |             |             |              |             |             |             |             |              |             |             |             |              |         |
|-----------------------------------------------|-------------|----------|-------------|-------------|-------------|-------------|--------------|-------------|-------------|-------------|-------------|--------------|-------------|-------------|-------------|--------------|---------|
| Inosine                                       | 269.0875749 | 211.918  | 0.032030371 | 0.036103426 | 0.004981053 | 0.022412572 | 0.027551194  | 0.022277632 | 0.003701264 | 0.003808679 | 0.003658717 | 0.013929268  | 0.004556036 | 0.003829113 | 0.002812135 | 4.341185489  | 1.26942 |
| Antipyrine                                    | 189.1013374 | 47.563   | 0.001581539 | 0.003309378 | 0.001181824 | 0.001970422 | 0.002911543  | 0.003072018 | 0.00584314  | 0.082889117 | 0.12884581  | 0.04262787   | 0.074417467 | 0.073742582 | 0.002949244 | 0.034348414  | 1.28537 |
| (+)-Mevalonolactone                           | 148.0961848 | 288.904  | 0.031514579 | 0.061321145 | 0.03123788  | 0.057980654 | 0.062402925  | 0.058342553 | 0.023140164 | 0.015055566 | 0.03011792  | 0.034031326  | 0.016159376 | 0.025054802 | 0.002959403 | 2.109233215  | 1.27086 |
| Urocanic acid                                 | 139.0507716 | 275.868  | 0.004802244 | 0.007957605 | 0.007175716 | 0.006791826 | 0.0066713296 | 0.006894685 | 0.006361874 | 0.121668041 | 0.148782955 | 0.054855552  | 0.098965303 | 0.091193247 | 0.002975163 | 0.077296449  | 1.20067 |
| Nicotinamide                                  | 123.055315  | 69.463   | 0.280815743 | 0.762327004 | 0.277099292 | 0.564957832 | 0.523522299  | 0.547160921 | 0.156287753 | 0.144520201 | 0.185716591 | 0.304363332  | 0.14953785  | 0.140486823 | 0.002996095 | 2.734600043  | 1.32761 |
| Trazodone                                     | 435.1611073 | 486.224  | 0.006325008 | 0.013741455 | 0.008898637 | 0.009710252 | 0.011376315  | 0.009707857 | 0.005622375 | 0.004933925 | 0.006745939 | 0.007211643  | 0.004779552 | 0.00505872  | 0.003130811 | 1.739615047  | 1.2732  |
| His-Gly                                       | 213.0971309 | 312.421  | 0.008907777 | 0.016291106 | 0.005934275 | 0.01046446  | 0.018782255  | 0.008812901 | 0.003561002 | 0.001903531 | 0.002810605 | 0.006378988  | 0.00214061  | 0.003244126 | 0.003153821 | 3.452929313  | 1.34531 |
| Diacyetyl                                     | 150.0536709 | 37.283   | 0.007383227 | 0.01186196  | 0.005285456 | 0.006410845 | 0.009779496  | 0.010476638 | 0.005337569 | 0.001653165 | 0.004395101 | 0.005849392  | 0.002489253 | 0.002903642 | 0.003422893 | 2.262566111  | 1.24164 |
| 2-Methylguanosine                             | 298.1135656 | 311.873  | 0.008127835 | 0.017788301 | 0.005836202 | 0.012237797 | 0.011995985  | 0.007453599 | 0.002958319 | 0.00270347  | 0.001315052 | 0.006463393  | 0.002048331 | 0.003961621 | 0.003460015 | 3.26165102   | 1.26812 |
| N-(omega)-Hydroxyarginine                     | 232.1440984 | 42.684   | 0.001543795 | 0.004904744 | 0.002320594 | 0.004170522 | 0.004368123  | 0.003606303 | 0.008712531 | 0.150041738 | 0.166989289 | 0.061487039  | 0.122447142 | 0.07081631  | 0.003508781 | 0.036028071  | 1.29169 |
| Bilirubin                                     | 584.2605923 | 46.174   | 0.008010629 | 0.017322454 | 0.002145625 | 0.014026319 | 0.01061103   | 0.00914154  | 0.001444752 | 0.001501139 | 0.001051742 | 0.004761908  | 0.001159603 | 0.001017346 | 0.003542379 | 5.601211815  | 1.30634 |
| Kynurenic acid                                | 190.0484395 | 174.487  | 0.008163843 | 0.036405936 | 0.020475149 | 0.020340326 | 0.032309428  | 0.023564127 | 0.002682745 | 0.001927051 | 0.01182404  | 0.013034466  | 0.004095688 | 0.005068445 | 0.00357597  | 3.65648215   | 1.25014 |
| Pro-Glu                                       | 245.1130877 | 410.0675 | 0.003817237 | 0.006571029 | 0.003735077 | 0.005188938 | 0.005772193  | 0.004895006 | 0.001622426 | 0.003319864 | 0.003434697 | 0.003656689  | 0.002841    | 0.002969769 | 0.003818577 | 1.680045527  | 1.15257 |
| Nicotinyl                                     | 257.0738915 | 231.033  | 0.010045351 | 0.010358325 | 0.012416586 | 0.008386082 | 0.009169757  | 0.012120785 | 0.005586267 | 0.006276886 | 0.009498054 | 0.008356241  | 0.006291966 | 0.005176206 | 0.00383926  | 1.517444341  | 1.15717 |
| Methimazole                                   | 246.0794675 | 160.9375 | 0.01049546  | 0.018406206 | 0.006981615 | 0.009480075 | 0.01972563   | 0.013228053 | 0.003651629 | 0.002842468 | 0.006173603 | 0.008048209  | 0.003923658 | 0.00378615  | 0.003882265 | 2.755126807  | 1.31485 |
| PGP(18:0/20:3)                                | 682.2164406 | 434.086  | 0.013701885 | 0.008883987 | 0.013929406 | 0.01214556  | 0.013065277  | 0.012241207 | 0.00632759  | 0.007853475 | 0.011742841 | 0.009383113  | 0.008081755 | 0.006484353 | 0.003944757 | 1.50316065   | 1.13061 |
| Nname,Cinoxacin                               | 525.1210874 | 394.416  | 0.018612669 | 0.034703432 | 0.025849279 | 0.02221249  | 0.02881005   | 0.024959878 | 0.012322125 | 0.015093042 | 0.019443367 | 0.020443376  | 0.013487719 | 0.015849868 | 0.003945509 | 1.605519087  | 1.23069 |
| N-epsilon,N-epsilon,N-epsilon-Trimethyllysine | 266.0740869 | 235.179  | 0.160432603 | 0.270888786 | 0.084441758 | 0.176081352 | 0.233638323  | 0.166726885 | 0.062214812 | 0.080061006 | 0.084937041 | 0.114455912  | 0.070449703 | 0.069523195 | 0.004028634 | 2.267681094  | 1.26556 |
| Sulfadiazine                                  | 251.0594176 | 45.8985  | 0.001072696 | 0.003950556 | 0.002338286 | 0.002797501 | 0.002899816  | 0.004091963 | 0.00887818  | 0.164383106 | 0.088144019 | 0.047840838  | 0.127302503 | 0.079783027 | 0.004220917 | 0.033216668  | 1.32438 |
| 3-Methoxy-4-Hydroxyphenylglycol Sulfate       | 282.0639444 | 176.217  | 0.003363728 | 0.007668554 | 0.002546919 | 0.004126015 | 0.005832988  | 0.005769717 | 0.001706989 | 0.001097575 | 0.002231404 | 0.003126186  | 0.001425483 | 0.004228938 | 0.00258938  | 2.653851358  | 1.31564 |
| Lisinopril                                    | 472.182886  | 456.255  | 0.246301099 | 0.386308263 | 0.137740647 | 0.180116035 | 0.297883783  | 0.234595625 | 0.034058893 | 0.03501651  | 0.150383753 | 0.170849059  | 0.052100302 | 0.08401529  | 0.004254982 | 2.817018213  | 1.25124 |
| Thiamine                                      | 265.1106694 | 348.0155 | 0.014710338 | 0.030415378 | 0.006929542 | 0.020254271 | 0.019965877  | 0.017224017 | 0.005838401 | 0.004766923 | 0.00363957  | 0.011280934  | 0.003560706 | 0.006870952 | 0.00446654  | 3.045246906  | 1.27043 |
| Nicotinamide adenine dinucleotide (NAD)       | 664.1128831 | 426.1715 | 0.044382904 | 0.058256011 | 0.016601749 | 0.026220242 | 0.032345453  | 0.030297124 | 0.010533605 | 0.006113798 | 0.006466248 | 0.023512407  | 0.0076595   | 0.010568697 | 0.004481165 | 3.208786887  | 1.31466 |
| Hyoxanthine                                   | 137.0454858 | 211.918  | 0.06986306  | 0.074693307 | 0.009094907 | 0.036080121 | 0.048379328  | 0.049184428 | 0.008209191 | 0.007423919 | 0.00707585  | 0.026834563  | 0.00710353  | 0.005925894 | 0.00452457  | 4.591363597  | 1.26035 |
| Purine                                        | 258.1156679 | 161.538  | 0.009108522 | 0.029901688 | 0.021488634 | 0.028007841 | 0.020524931  | 0.01875705  | 0.009720487 | 0.006975749 | 0.009067212 | 0.013804826  | 0.006971891 | 0.011210491 | 0.004561711 | 2.212765618  | 1.19178 |
| DL-a-Hydroxybutyric acid                      | 168.0651237 | 250.563  | 0.015692553 | 0.030164908 | 0.018790849 | 0.023638634 | 0.033005841  | 0.016882341 | 0.010887957 | 0.00743832  | 0.013642322 | 0.016730221  | 0.009110693 | 0.00934292  | 0.004612559 | 2.057633951  | 1.29446 |
| Creatine                                      | 263.1457127 | 337.5615 | 0.084119633 | 0.139094444 | 0.088264743 | 0.098458977 | 0.096941546  | 0.089788024 | 0.059386327 | 0.065850922 | 0.06910296  | 0.082611801  | 0.055774133 | 0.066667906 | 0.004633476 | 1.493931541  | 1.27447 |
| Uracil                                        | 113.0345977 | 160.9375 | 0.242244973 | 0.485589929 | 0.121859533 | 0.448223017 | 0.435479634  | 0.318555785 | 0.090794972 | 0.06864544  | 0.106699919 | 0.214006476  | 0.071470921 | 0.111313911 | 0.004718028 | 2.902618525  | 1.28033 |
| Bacampicillin                                 | 466.1732519 | 250.8535 | 0.001903029 | 0.004242629 | 0.002051259 | 0.00238089  | 0.003226345  | 0.003957408 | 0.000743365 | 0.00104461  | 0.001751621 | 0.002026497  | 0.001354459 | 0.000989995 | 0.004740018 | 2.245301115  | 1.23984 |
| N-Methylanthranilic Acid                      | 152.0687551 | 246.535  | 0.006760008 | 0.01503195  | 0.004451312 | 0.009948231 | 0.011392779  | 0.008118645 | 0.003824161 | 0.002603656 | 0.002955712 | 0.0060133524 | 0.002290829 | 0.003014586 | 0.004746585 | 2.690641763  | 1.3123  |
| Phenylpyruvate                                | 346.1297761 | 417.398  | 0.00185271  | 0.004921295 | 0.001752856 | 0.003872615 | 0.004577313  | 0.002305455 | 0.000631524 | 0.000932422 | 0.000905837 | 0.001980614  | 0.000877914 | 0.000762382 | 0.004863719 | 3.165853869  | 1.31246 |
| PE(18:0/P-18:1)                               | 149.0222443 | 33.038   | 0.039339672 | 0.076656736 | 0.063551013 | 0.091798178 | 0.064749871  | 0.080094288 | 0.0378498   | 0.036998858 | 0.049508288 | 0.048507543  | 0.030886614 | 0.042229203 | 0.005047008 | 1.691531696  | 1.15526 |
| Thymidine                                     | 306.1010929 | 229.407  | 0.055862389 | 0.019673356 | 0.046047956 | 0.053962628 | 0.036872116  | 0.03001526  | 0.008296333 | 0.001887822 | 0.027813414 | 0.027811703  | 0.005442905 | 0.013034287 | 0.005136864 | 2.876306509  | 1.16017 |
| Larixinic Acid                                | 144.0659835 | 270.0445 | 0.197362993 | 0.065623979 | 0.049407954 | 0.145927482 | 0.108184954  | 0.101095401 | 0.001682737 | 0.002291253 | 0.049687281 | 0.065172256  | 0.007553421 | 0.013593991 | 0.005208368 | 4.769240496  | 1.21475 |
| 3-Aminobutanoic acid                          | 86.06078584 | 305.022  | 0.006430086 | 0.01604812  | 0.005078277 | 0.007084516 | 0.009690186  | 0.007971962 | 0.0020707   | 0.00231912  | 0.002480798 | 0.005489208  | 0.00211136  | 0.001683047 | 0.005218657 | 3.2377736326 | 1.3472  |
| Ibuprofen                                     | 267.1579036 | 157.416  | 0.003958928 | 0.006974688 | 0.010865641 | 0.00493639  | 0.005546866  | 0.006750065 | 0.001683082 | 0.002825529 | 0.003437326 | 0.004010773  | 0.002799051 | 0.0018857   | 0.005247908 | 2.345501876  | 1.16316 |
| EDTA                                          | 293.1051856 | 436.747  | 0.013854654 | 0.022437898 | 0.00802267  | 0.012532405 | 0.020032733  | 0.018168767 | 0.006895756 | 0.005605828 | 0.006659991 | 0.012382695  | 0.004788873 | 0.00713699  | 0.005465031 | 2.186538675  | 1.27402 |
| DG(14:1/14:0/0:0)                             | 497.1303103 | 161.129  | 0.009525844 | 0.009224309 | 0.00579686  | 0.006164483 | 0.010662724  | 0.006586698 | 0.003441235 | 0.002410287 | 0.006583756 | 0.006121032  | 0.00349649  | 0.003071551 | 0.005488259 | 1.885060354  | 1.22994 |
| Lincomycin                                    | 407.2206687 | 72.6165  | 0.000337442 | 0.001266493 | 0.000414465 | 0.000597412 | 0.001114027  | 0.000681596 | 0.000916187 | 0.01921273  | 0.008530376 | 0.005465351  | 0.016159204 | 0.013313713 | 0.005676167 | 0.069364846  | 1.25998 |
| Guanosine triphosphate adenosine              | 1029.415302 | 376.168  | 0.059557797 | 0.160763245 | 0.084590367 | 0.111876141 | 0.13809595   | 0.136620659 | 0.051573293 | 0.051431189 | 0.065742668 | 0.077228197  | 0.046510176 | 0.061257438 | 0.005712808 | 1.954820972  | 1.22837 |
| sn-Glycerol 1-phosphate                       | 217.0443208 | 106.46   | 0.010596001 | 0.044303307 | 0.00563508  | 0.02794575  | 0.038948857  | 0.030109668 | 0.002592005 | 0.000161232 | 0.004572665 | 0.010597605  | 0.001771907 | 0.002885187 | 0.005758963 | 6.976725863  | 1.23447 |
| Ala-Val                                       | 189.1275019 | 41.315   | 0.001638889 | 0.00439413  | 0.003326158 | 0.004133026 | 0.005062668  | 0.00293246  | 0.001006139 | 0.072271334 | 0.128005677 | 0.043385117  | 0.078582537 | 0.057724265 | 0.005774252 | 0.056400885  | 1.03541 |
| L-Histidinol                                  | 124.0880026 | 284.7915 | 0.015475933 | 0.021739536 | 0.010133987 | 0.008182943 | 0.001454822  | 0.018366043 | 0.00842207  | 0.006829627 | 0.003127811 | 0.009862368  | 0.007514484 | 0.005251094 | 0.005819716 | 2.229935763  | 1.07739 |
| p-CHLOROPHENYLALANINE                         | 200.0466518 | 283.2495 | 0.259971028 | 0.19490898  | 0.123921253 | 0.363816574 | 0.21982387   | 0.162936358 | 0.088280582 | 0.092750556 | 0.090535441 | 0.1461937    | 0.084531268 | 0.069670121 | 0.005822232 | 2.317249804  | 1.28134 |
| PE(16:1/20:3)                                 | 477.1034872 | 166.515  | 0.005546218 | 0.006439773 | 0.003784077 | 0.006705773 | 0.005416563  |             |             |             |             |              |             |             |             |              |         |

|                                               |             |          |             |             |             |             |             |              |             |             |             |             |             |              |             |             |          |
|-----------------------------------------------|-------------|----------|-------------|-------------|-------------|-------------|-------------|--------------|-------------|-------------|-------------|-------------|-------------|--------------|-------------|-------------|----------|
| Erythrono-1,4-lactone                         | 160.0566572 | 315.743  | 0.021091231 | 0.035374827 | 0.000432377 | 0.02442587  | 0.028098922 | 0.023317593  | 0.00367806  | 0.003295836 | 0.004920472 | 0.01217944  | 0.004222622 | 0.004052153  | 0.007309727 | 4.103450837 | 0.815265 |
| L-leucyl-L-proline                            | 211.1423778 | 44.633   | 0.004853162 | 0.009272625 | 0.005471947 | 0.005452215 | 0.009433708 | 0.00505664   | 0.004065733 | 0.002788752 | 0.002607221 | 0.005020051 | 0.002543214 | 0.003038545  | 0.007323201 | 1.970756123 | 1.24718  |
| L-Carnitine                                   | 162.1120025 | 462.9295 | 0.036559648 | 0.063480912 | 0.036465746 | 0.068501188 | 0.076340851 | 0.056356048  | 0.021375507 | 0.028607055 | 0.043599699 | 0.039020998 | 0.029437866 | 0.019895751  | 0.007690546 | 1.856162425 | 1.1811   |
| PC(22:2/16:0)                                 | 702.263919  | 395.5435 | 0.678156844 | 1.286346359 | 0.770825776 | 1.13060665  | 1.152362998 | 1.142566307  | 0.618332379 | 0.507299328 | 0.737332416 | 0.768694214 | 0.672611373 | 0.732041073  | 0.007770073 | 1.526360398 | 1.18579  |
| Glycine                                       | 117.0656356 | 320.7055 | 0.006161147 | 0.004864448 | 0.011384574 | 0.009944151 | 0.005565239 | 0.006267815  | 0.003102371 | 0.003523544 | 0.003808635 | 0.004427231 | 0.003679871 | 0.003930583  | 0.007914418 | 1.96631372  | 1.66695  |
| 3-Amino-3-(4-hydroxyphenyl)propanoate         | 380.1795562 | 134.3885 | 0.001123973 | 0.002416534 | 0.00184757  | 0.00179039  | 0.002696493 | 0.001888492  | 0.001642265 | 0.008728505 | 0.005302777 | 0.003857527 | 0.007250944 | 0.005630085  | 0.007970178 | 0.362933932 | 1.17245  |
| 5-Methyl-5,6-Dihydrouracil                    | 111.0550568 | 626.908  | 0.003234482 | 0.006808638 | 0.004196449 | 0.004742902 | 0.007605385 | 0.00553223   | 0.003311263 | 0.003366703 | 0.000190415 | 0.003394529 | 0.003116726 | 0.002063244  | 0.008247101 | 2.079928485 | 0.757568 |
| Inositol cyclic phosphate                     | 225.0142156 | 469.463  | 0.005233816 | 0.017567096 | 0.003405104 | 0.016326501 | 0.014674223 | 0.006798919  | 0.001610079 | 0.000947502 | 0.002524483 | 0.004570453 | 0.001263984 | 0.002071606  | 0.0082699   | 4.928020611 | 1.31331  |
| Diphenylamine                                 | 230.1131078 | 277.144  | 0.001744783 | 0.005105624 | 0.001582018 | 0.003504905 | 0.005141201 | 0.002252472  | 0.000547991 | 0.000579141 | 0.001323059 | 0.001826979 | 0.000616702 | 0.000791896  | 0.008359703 | 3.399893031 | 1.3073   |
| 4-Guanidinobutyric acid                       | 146.0928475 | 313.841  | 0.002911601 | 0.00339308  | 0.001998912 | 0.002116784 | 0.003025095 | 0.002934257  | 0.001814871 | 0.001362462 | 0.001948518 | 0.002320476 | 0.001766858 | 0.002079411  | 0.008645338 | 1.450483928 | 1.16466  |
| PC(16:1/16:1)                                 | 535.0798219 | 434.937  | 0.013697033 | 0.025807211 | 0.013208225 | 0.025218202 | 0.028093052 | 0.019189045  | 0.014374202 | 0.011041474 | 0.010069654 | 0.014639822 | 0.008399338 | 0.011802044  | 0.008776142 | 1.780484444 | 1.1767   |
| Dihydrothymine                                | 111.0546542 | 151.7335 | 0.044978737 | 0.059929778 | 0.045945969 | 0.078109651 | 0.036648644 | 0.03801081   | 0.013890335 | 0.033747712 | 0.03042551  | 0.036196557 | 0.027500589 | 0.020876571  | 0.009238315 | 1.866875788 | 1.09271  |
| Dimethylglycine                               | 245.0947781 | 234.366  | 0.016598947 | 0.038549381 | 0.007378474 | 0.025285896 | 0.032309515 | 0.025249467  | 0.005329916 | 0.007978874 | 0.008371724 | 0.014441117 | 0.009577579 | 0.009673666  | 0.00951157  | 2.625322911 | 1.17245  |
| CerP(d18:1/26:1)                              | 551.1378336 | 290.4575 | 0.034875951 | 0.054546525 | 0.017971081 | 0.044983451 | 0.03814765  | 0.028550945  | 0.013907856 | 0.018703386 | 0.017464667 | 0.024794929 | 0.017933576 | 0.022304079  | 0.009599183 | 1.903209722 | 1.15993  |
| N-Acetyl-L-Histidine                          | 198.0864696 | 303.6365 | 0.023236025 | 0.056282786 | 0.028499934 | 0.065108623 | 0.067271867 | 0.040300042  | 0.017967667 | 0.017050349 | 0.023616713 | 0.028911642 | 0.01791515  | 0.023613285  | 0.009695219 | 2.174702296 | 1.21524  |
| Dodecanoic acid                               | 218.2105898 | 101.986  | 0.012714297 | 0.017518233 | 0.01175738  | 0.013177048 | 0.01498483  | 0.016646991  | 0.008975166 | 0.012819483 | 0.009029619 | 0.012213699 | 0.011892829 | 0.008740394  | 0.009876781 | 1.363234539 | 1.04739  |
| S-Methyl-5-thioadenosine                      | 298.095997  | 83.544   | 0.130454971 | 0.109822048 | 0.284078213 | 0.125772492 | 0.141801572 | 0.147773547  | 0.02891903  | 0.077870951 | 0.072671111 | 0.105691363 | 0.058638726 | 0.005694185  | 0.010238275 | 2.294835452 | 1.12208  |
| LysoPC(O-18:0)                                | 375.0639509 | 364.704  | 0.015329395 | 0.033027577 | 0.019638559 | 0.02510047  | 0.03160429  | 0.018130564  | 0.01421436  | 0.011174204 | 0.015849456 | 0.018381623 | 0.01068646  | 0.010806087  | 0.010288568 | 1.760904927 | 1.23287  |
| Deoxyguanosine                                | 309.1287756 | 484.985  | 0.012992262 | 0.043364197 | 0.0151649   | 0.01952959  | 0.030121648 | 0.023624444  | 0.008587222 | 0.008993107 | 0.006661187 | 0.015833279 | 0.007751358 | 0.005955438  | 0.010298823 | 2.692316057 | 1.26394  |
| Val-Gln                                       | 309.1551384 | 466.486  | 0.01200644  | 0.031178624 | 0.011837675 | 0.010485217 | 0.029867352 | 0.018355368  | 0.001534816 | 0.007435613 | 0.006182487 | 0.010781603 | 0.006578374 | 0.005273881  | 0.010354712 | 3.009801154 | 1.12404  |
| Quadrone                                      | 231.1408632 | 267.721  | 0.004560371 | 0.011775344 | 0.001534268 | 0.006712118 | 0.012620743 | 0.00700211   | 0.001309667 | 0.001378279 | 0.00116017  | 0.004224487 | 0.001551046 | 0.000693391  | 0.010622275 | 4.284654707 | 1.23345  |
| L-Proline                                     | 116.0699214 | 80.379   | 0.005578911 | 0.026626476 | 0.009971252 | 0.017517248 | 0.023060527 | 0.013797677  | 0.008102503 | 0.003754928 | 0.002236268 | 0.008913116 | 0.004266809 | 0.005287545  | 0.010703745 | 2.965252599 | 1.1431   |
| Glycerophosphocholine                         | 258.1097567 | 418.8005 | 0.882179913 | 2.545127763 | 0.750045471 | 1.969315521 | 1.706345438 | 1.85498066   | 0.625638237 | 0.535886942 | 0.659301729 | 1.085772936 | 0.502271703 | 0.801918376  | 0.010731011 | 2.305504417 | 1.22439  |
| Choline                                       | 104.1070975 | 376.8195 | 0.092361666 | 0.112572274 | 0.10767687  | 0.102280396 | 0.092735338 | 0.092510208  | 0.07977599  | 0.077505188 | 0.092572287 | 0.096447324 | 0.071521244 | 0.060952317  | 0.01082416  | 1.253485597 | 1.13648  |
| Picolinic acid                                | 141.0656568 | 124.757  | 0.017879446 | 0.011767698 | 0.006519664 | 0.013429387 | 0.013114739 | 0.010834615  | 0.006055912 | 0.005328996 | 0.006618329 | 0.010446996 | 0.007198294 | 0.006481488  | 0.01102118  | 1.74568058  | 1.19053  |
| Pantothenate                                  | 220.1180579 | 280.434  | 0.021362534 | 0.056345737 | 0.019301576 | 0.023972866 | 0.05255733  | 0.035790945  | 0.00896553  | 0.011846819 | 0.014572072 | 0.022942475 | 0.010481222 | 0.011037688  | 0.011110594 | 2.621690462 | 1.26992  |
| His-Ile                                       | 291.1446168 | 248.154  | 0.009453368 | 0.019696528 | 0.010318611 | 0.009171962 | 0.015990062 | 0.011471658  | 0.007489978 | 0.005310629 | 0.006814243 | 0.009797908 | 0.006913228 | 0.005454792  | 0.011584025 | 1.821464143 | 1.23006  |
| Riboflavin                                    | 359.1348169 | 79.67    | 0.004954603 | 0.009587879 | 0.001619968 | 0.003912562 | 0.007744612 | 0.004381792  | 0.001083642 | 0.000393024 | 0.001953152 | 0.003668954 | 0.000637887 | 0.0010813902 | 0.011736113 | 3.628050174 | 1.26526  |
| Adenosine monophosphate (AMP)                 | 348.0699151 | 428.7725 | 0.015241742 | 0.030063256 | 0.00962773  | 0.035698715 | 0.017239278 | 0.014798082  | 0.009299954 | 0.006189943 | 0.004965676 | 0.011680738 | 0.006540215 | 0.005697722  | 0.011977972 | 2.764414239 | 1.23302  |
| 1-Palmitoyl-2-hydroxy-sn-glycero-3-phosphoeth | 454.2918933 | 180.216  | 0.00289884  | 0.01449031  | 0.00241146  | 0.008869198 | 0.007960121 | 0.0077118971 | 0.019283123 | 0.031093885 | 0.00655812  | 0.012760006 | 0.022552293 | 0.028282846  | 0.012345066 | 0.362970222 | 1.09782  |
| 5-Aminopentanoic acid                         | 100.0757985 | 63.652   | 0.0147157   | 0.05219365  | 0.014526325 | 0.02584053  | 0.037753727 | 0.040009133  | 0.010098133 | 0.008577442 | 0.010506704 | 0.019780522 | 0.008099565 | 0.011233682  | 0.012505448 | 2.709377804 | 1.24922  |
| 2-Hydroxyadenine                              | 152.0561401 | 220.196  | 0.00842164  | 0.016174671 | 0.001825556 | 0.005939133 | 0.008679268 | 0.009806777  | 0.002530944 | 0.00219522  | 0.001102514 | 0.004861378 | 0.001895482 | 0.001897945  | 0.012685807 | 3.5106918   | 1.15294  |
| Propazine                                     | 247.1437386 | 189.5735 | 0.060169001 | 0.432916158 | 0.310783302 | 0.186295485 | 0.57669847  | 0.296839229  | 0.108867013 | 0.019351463 | 0.059571928 | 0.156304214 | 0.038538727 | 0.08824439   | 0.012782393 | 3.957931128 | 1.12898  |
| Indole-3-butyric acid                         | 264.1224667 | 246.163  | 0.002243456 | 0.012890236 | 0.003163931 | 0.00604466  | 0.006784377 | 0.00519481   | 0.000677019 | 0.000588696 | 0.001490697 | 0.003101131 | 0.000707353 | 0.000990059  | 0.012842896 | 4.807635519 | 1.33131  |
| Xanthylic acid (XMP)                          | 365.0571927 | 295.578  | 0.055468987 | 0.089606234 | 0.057990477 | 0.123098255 | 0.087557073 | 0.052150516  | 0.049922719 | 0.001241223 | 0.053167172 | 0.051170417 | 0.021387366 | 0.033590711  | 0.012989672 | 2.21338089  | 0.923827 |
| Altretamine                                   | 228.1951553 | 36.194   | 0.047187736 | 0.10739422  | 0.250834526 | 0.125242968 | 0.140115128 | 0.174050235  | 0.239880592 | 0.389948955 | 0.182480729 | 0.188666557 | 0.315688498 | 0.390862089  | 0.013052332 | 0.494765005 | 1.11177  |
| Uridine                                       | 245.0759482 | 160.9375 | 0.080324484 | 0.170340116 | 0.041116486 | 0.064428046 | 0.120042429 | 0.112223974  | 0.028744637 | 0.023182413 | 0.048745277 | 0.069027187 | 0.030952054 | 0.022441078  | 0.013084802 | 2.637807859 | 1.24556  |
| D-Lactose                                     | 343.1235891 | 483.8575 | 0.155471334 | 0.301295495 | 0.175633878 | 0.182318002 | 0.213327476 | 0.158019024  | 0.109877453 | 0.122342306 | 0.128829371 | 0.159252765 | 0.13382841  | 0.101546018  | 0.013249421 | 1.569541314 | 1.19978  |
| Miglitol                                      | 249.1495424 | 189.3865 | 0.001404929 | 0.008708822 | 0.005451838 | 0.003947847 | 0.00574883  | 0.004297757  | 0.002204506 | 0.001266806 | 0.001602556 | 0.003237143 | 0.001416566 | 0.001201025  | 0.013265412 | 2.704831139 | 1.14115  |
| Pro-Phe                                       | 245.1241752 | 291.1345 | 0.005684089 | 0.008284457 | 0.005291755 | 0.006803224 | 0.011824792 | 0.009245774  | 0.006429871 | 0.003073581 | 0.00333596  | 0.005605172 | 0.004576477 | 0.003627577  | 0.013779972 | 1.768724203 | 1.11709  |
| 5-Hydroxytryptophol (5HTOL)                   | 178.08552   | 268.209  | 0.005114181 | 0.007894692 | 0.002262836 | 0.006871829 | 0.008903503 | 0.004493785  | 0.002235301 | 0.001471416 | 0.003949119 | 0.003977513 | 0.00165359  | 0.002804536  | 0.014095456 | 2.20867422  | 1.17352  |
| isocarboxazid                                 | 485.1974933 | 464.49   | 0.008572403 | 0.022911243 | 0.01373148  | 0.014119638 | 0.018801792 | 0.018977892  | 0.018095467 | 0.027264897 | 0.038027908 | 0.023029572 | 0.025788926 | 0.025026064  | 0.014572038 | 0.61764738  | 1.15367  |
| Indole-3-acetamide                            | 216.1137592 | 42.804   | 0.008057868 | 0.011032527 | 0.000828568 | 0.006518597 | 0.010609818 | 0.007068205  | 0.001311866 | 0.067123989 | 0.006301063 | 0.02134574  | 0.04719205  | 0.005405234  | 0.020988281 | 0.810053    |          |
| trans-3-Coumaric acid                         | 346.1307166 | 393.4765 | 0.045128    | 0.088422649 | 0.062475479 | 0.054885421 | 0.075303833 | 0.062242475  | 0.044847751 | 0.036823226 | 0.051062776 | 0.0544713   | 0.042437423 | 0.036633009  | 0.014628523 | 1.458857007 | 1.16934  |
| 1-Oleoyl-L- $\alpha$ -lysophosphatidic acid   | 478.2915276 | 180.139  | 0.033170202 | 0.053003828 | 0.0270      |             |             |              |             |             |             |             |             |              |             |             |          |

|                                         |             |          |             |             |             |             |             |             |             |              |              |             |              |             |              |             |          |
|-----------------------------------------|-------------|----------|-------------|-------------|-------------|-------------|-------------|-------------|-------------|--------------|--------------|-------------|--------------|-------------|--------------|-------------|----------|
| Acyclovir                               | 286.1145862 | 237.324  | 0.002642876 | 0.018921168 | 0.004110577 | 0.01401895  | 0.013232558 | 0.007773643 | 0.001557656 | 0.003468426  | 0.001053069  | 0.004880774 | 0.002633264  | 0.002329776 | 0.018007989  | 3.812089771 | 1.11987  |
| PE(14:1/P-18:1)                         | 176.8748224 | 328.169  | 0.338141473 | 1.087417027 | 0.657271798 | 0.888354322 | 1.35091508  | 0.917302381 | 0.444725762 | 0.434552234  | 0.545275138  | 0.600015288 | 0.379735549  | 0.320697365 | 0.018166198  | 1.922715417 | 1.09862  |
| Pantoprazole                            | 366.0789808 | 318.562  | 0.016711328 | 0.031239298 | 0.004722845 | 0.021043209 | 0.016462474 | 0.017437757 | 0.005375105 | 0.004465489  | 0.010720033  | 0.012748688 | 0.005536115  | 0.005416782 | 0.018609446  | 2.43134959  | 1.14278  |
| Nuchromine                              | 243.0868628 | 49.8215  | 0.010958271 | 0.010189312 | 0.007228744 | 0.009071702 | 0.008970767 | 0.011555806 | 0.017168707 | 0.017311949  | 0.008234029  | 0.011912572 | 0.013936564  | 0.015917949 | 0.018712971  | 0.686238013 | 0.972402 |
| Li-Acetyl-D-Glucosamine 6-Phosphate     | 284.0524044 | 447.926  | 0.016782026 | 0.072455996 | 0.02416664  | 0.052208841 | 0.00450089  | 0.040539859 | 0.012783455 | 0.001283451  | 0.022194716  | 0.028378143 | 0.015206077  | 0.011482198 | 0.01895855   | 2.399576045 | 1.21072  |
| Lys-Pro                                 | 261.1880037 | 213.5715 | 0.035204583 | 0.186935346 | 0.056343714 | 0.111161838 | 0.118542035 | 0.078202318 | 0.009296841 | 0.016295069  | 0.059944942  | 0.056836663 | 0.027202932  | 0.019491975 | 0.019153155  | 3.101468917 | 1.19024  |
| L-Arginine                              | 175.1184499 | 565.162  | 0.065084434 | 0.484775999 | 0.259463068 | 0.136866662 | 0.412643336 | 0.247748495 | 0.145180448 | 0.0159542    | 0.033246218  | 0.147766844 | 0.043758359  | 0.069728142 | 0.019573771  | 3.526034602 | 1.08953  |
| DG(18:3n6/0/0/20:2n6)                   | 825.3794573 | 337.345  | 0.009560438 | 0.018007325 | 0.010142257 | 0.006247058 | 0.012027413 | 0.011664747 | 0.00662329  | 0.005256333  | 0.007236475  | 0.008942273 | 0.004471509  | 0.006814946 | 0.020220766  | 1.719393498 | 1.11125  |
| Stachyose                               | 667.2276295 | 395.6715 | 0.063851288 | 0.118187341 | 0.071688572 | 0.08534013  | 0.128568603 | 0.085461539 | 0.058799461 | 0.049543232  | 0.071010439  | 0.07544694  | 0.0057893231 | 0.054461187 | 0.020505683  | 1.50644344  | 1.19085  |
| NG,NG-dimethyl-L-arginine(ADMA)         | 203.1496674 | 499.459  | 0.048226372 | 0.209719951 | 0.084230082 | 0.288101235 | 0.228386353 | 0.14308817  | 0.04741245  | 0.04769868   | 0.082428537  | 0.088383352 | 0.047464022  | 0.065272093 | 0.02133425   | 2.645524888 | 1.12698  |
| 1-Methylguanosine                       | 298.1137331 | 192.985  | 0.019080768 | 0.047312791 | 0.016990733 | 0.035794241 | 0.0385839   | 0.021979657 | 0.00497735  | 0.005462597  | 0.025500285  | 0.019482474 | 0.008833181  | 0.016310613 | 0.021495853  | 2.230978012 | 1.13414  |
| 2-Methylbutyroylcarnitine               | 246.1692832 | 231.1915 | 0.481811499 | 6.133692811 | 1.41796766  | 3.01540443  | 4.348678202 | 2.538297246 | 0.726236174 | 0.235625398  | 0.737387608  | 1.458818849 | 0.344992514  | 0.578490121 | 0.021579072  | 4.394371974 | 1.19594  |
| 2-Ethoxyethanol                         | 151.0951829 | 62.593   | 0.006427295 | 0.00444886  | 0.00423531  | 0.005780252 | 0.004672111 | 0.005945095 | 0.0033867   | 0.003358806  | 0.000864884  | 0.003968462 | 0.003645592  | 0.002576755 | 0.021865563  | 1.591263388 | 0.874668 |
| PE(22:6/24:1)                           | 972.576399  | 328.523  | 0.002532381 | 0.009262087 | 0.005758733 | 0.006493924 | 0.008196271 | 0.008170703 | 0.0036088   | 0.004056875  | 0.004625094  | 0.004766644 | 0.003635778  | 0.003152655 | 0.022079789  | 1.694806676 | 1.00603  |
| Desoxyepiganine                         | 233.1283457 | 210.5325 | 0.017232786 | 0.060417165 | 0.013788249 | 0.035282964 | 0.056193456 | 0.031644951 | 0.009466273 | 0.003598646  | 0.022190597  | 0.022963788 | 0.007535889  | 0.010211179 | 0.022184674  | 2.824401974 | 1.20091  |
| Ph-e-Ala                                | 281.0849147 | 261.918  | 0.00179743  | 0.006660963 | 0.01165337  | 0.011695609 | 0.008267724 | 0.00866197  | 0.013013311 | 0.011883402  | 0.013436551  | 0.009732459 | 0.014549634  | 0.012752692 | 0.022339024  | 0.646654208 | 0.916749 |
| Phthalic acid Mono-2-ethylhexyl Ester   | 279.158555  | 33.2685  | 0.100118281 | 0.174855868 | 0.134195532 | 0.120078123 | 0.143523062 | 0.134385543 | 0.090169986 | 0.095948082  | 0.01203856   | 0.111770362 | 0.0880756231 | 0.114461993 | 0.022366353  | 1.304114466 | 1.07873  |
| DL-O-tyrosine                           | 363.156829  | 394.377  | 0.01528613  | 0.047056846 | 0.03236197  | 0.055096793 | 0.046559459 | 0.03683959  | 0.02422911  | 0.018893519  | 0.0251402    | 0.027046151 | 0.017191657  | 0.024230455 | 0.022440506  | 1.705543228 | 1.01938  |
| 1-Methyladenosine                       | 282.1177731 | 310.5915 | 0.025536436 | 0.054709188 | 0.034921142 | 0.054856828 | 0.04929394  | 0.042484355 | 0.031879932 | 0.03185384   | 0.029776111  | 0.035117136 | 0.028971875  | 0.020091723 | 0.022948456  | 1.47290851  | 1.03322  |
| Primidone                               | 218.1073601 | 63.862   | 0.000432657 | 0.000565909 | 0.000566002 | 0.000569346 | 0.000597878 | 0.000467847 | 0.000437551 | 0.00272599   | 0.001143854  | 0.000960098 | 0.001860344  | 0.001316651 | 0.0223969384 | 0.378902664 | 1.11929  |
| 1,2,3-Benzenetriol                      | 144.0648285 | 481.395  | 0.010167627 | 0.018696341 | 0.011545017 | 0.018311021 | 0.017526371 | 0.013547581 | 0.009939646 | 0.010801992  | 0.012636686  | 0.012087935 | 0.009743495  | 0.007647105 | 0.023352841  | 1.428546692 | 1.09498  |
| Ethyl 3-hydroxybutyrate                 | 196.0959026 | 49.0825  | 0.004768887 | 0.014213655 | 0.006698666 | 0.00783155  | 0.015734863 | 0.011878808 | 0.004687388 | 0.00579172   | 0.004474579  | 0.006973326 | 0.005225841  | 0.004608356 | 0.023872282  | 1.924562351 | 1.09225  |
| PC(20:1/14:1)                           | 874.5949246 | 328.675  | 0.00354394  | 0.012193656 | 0.007486961 | 0.009378511 | 0.012207708 | 0.009673628 | 0.004698822 | 0.005100103  | 0.005896646  | 0.006636284 | 0.004567372  | 0.005725671 | 0.023874581  | 1.670025267 | 1.03996  |
| DL- $\alpha$ -Phenylglycine             | 169.0962469 | 121.8195 | 0.00963933  | 0.075374239 | 0.005034264 | 0.044733664 | 0.063661581 | 0.035894716 | 0.00381087  | 0.004162571  | 0.008368273  | 0.018156997 | 0.006143493  | 0.006396951 | 0.023889696  | 4.98176028  | 1.17387  |
| Lamivudine                              | 476.1419463 | 418.811  | 0.014674913 | 0.008371699 | 0.009904535 | 0.013498392 | 0.010647024 | 0.009894601 | 0.004216647 | 0.006227118  | 0.011320293  | 0.008954897 | 0.00684579   | 0.007143752 | 0.024098139  | 1.498398929 | 1.02266  |
| Lysyl-Leucine                           | 686.4587193 | 38.055   | 0.006267353 | 0.015650678 | 0.00557159  | 0.009324638 | 0.010524065 | 0.01004824  | 0.006067061 | 0.005321673  | 0.00531405   | 0.007299883 | 0.004485648  | 0.004468204 | 0.024286428  | 1.74128111  | 1.16887  |
| Lysyl-Proline                           | 538.96711   | 351.2645 | 0.00501703  | 0.008676169 | 0.002349824 | 0.00668496  | 0.005407037 | 0.006019113 | 0.003495209 | 0.003008957  | 0.003250282  | 0.004616484 | 0.00274494   | 0.002799802 | 0.024455704  | 1.71493734  | 1.08208  |
| Adenosine                               | 268.1031544 | 170.3685 | 0.357799349 | 0.134699982 | 0.040811553 | 0.178427312 | 0.153768691 | 0.159567693 | 0.035958095 | 0.031363909  | 0.044753008  | 0.121488785 | 0.03956216   | 0.052543877 | 0.025529553  | 3.148604383 | 1.17927  |
| Cer(d18:0/14:0)                         | 270.2788253 | 39.365   | 0.00860357  | 0.02113404  | 0.007769923 | 0.009543725 | 0.01414904  | 0.011259651 | 0.008040371 | 0.005311189  | 0.003999139  | 0.009937575 | 0.005990613  | 0.004044091 | 0.026301021  | 1.941429995 | 1.14781  |
| D-Ribose                                | 150.0546246 | 152.237  | 0.007658359 | 0.02118041  | 0.010484022 | 0.01844612  | 0.016467074 | 0.014899596 | 0.007961004 | 0.008093166  | 0.012618495  | 0.010799015 | 0.008187068  | 0.006375592 | 0.026607938  | 1.649609878 | 1.10077  |
| Donepezil                               | 424.1810436 | 483.835  | 0.0068196   | 0.023151987 | 0.015434557 | 0.018144099 | 0.026743725 | 0.018505084 | 0.010038034 | 0.008578799  | 0.010913824  | 0.013488014 | 0.008842264  | 0.011811328 | 0.026752115  | 1.708735435 | 1.03454  |
| D-Biotin                                | 262.1172393 | 237.47   | 0.00528064  | 0.004819893 | 0.009668207 | 0.004643279 | 0.006635    | 0.006526876 | 0.001394629 | 0.001805245  | 0.0047194631 | 0.004715206 | 0.002705063  | 0.004103389 | 0.027035958  | 1.796233015 | 0.979486 |
| Daidzin                                 | 417.1160591 | 132.824  | 0.000543308 | 0.001279957 | 0.000910945 | 0.00103131  | 0.001086634 | 0.001081493 | 0.002443627 | 0.004641629  | 0.02440384   | 0.007066401 | 0.007483265  | 0.009177584 | 0.027681476  | 0.107461783 | 1.24341  |
| sn-Glycerol 3-phosphoethanolamine       | 216.0624875 | 389.2925 | 0.140423304 | 0.346534188 | 0.130246199 | 0.218389064 | 0.343278559 | 0.203762458 | 0.13175594  | 0.110453061  | 0.103691454  | 0.164242753 | 0.121024052  | 0.139471313 | 0.028359669  | 1.794140367 | 1.13231  |
| 3-Methoxy-4-hydroxyphenylethyleneglycol | 202.1066099 | 260.293  | 0.011942257 | 0.05762648  | 0.013897978 | 0.022262785 | 0.048589299 | 0.029911425 | 0.011630237 | 0.010669924  | 0.004796923  | 0.01891927  | 0.0104924    | 0.007585842 | 0.029357293  | 2.874348783 | 1.11508  |
| Phosphocreatine                         | 212.0426449 | 434.746  | 0.602810943 | 1.162058069 | 0.501669309 | 0.697811217 | 1.622117896 | 0.730312571 | 0.419761054 | 0.351162627  | 0.435917099  | 0.645802338 | 0.429269554  | 0.284524178 | 0.029535243  | 2.071658223 | 1.18559  |
| Tyr-Val                                 | 344.1549319 | 339.387  | 0.001859505 | 0.004016208 | 0.001327347 | 0.002813089 | 0.002576802 | 0.00299512  | 0.002168612 | 0.001579193  | 0.000463104  | 0.001819204 | 0.001439554  | 0.001308795 | 0.0298821    | 1.775717774 | 0.862793 |
| Arg-Ala                                 | 245.1495124 | 292.1135 | 0.005621749 | 0.017811573 | 0.004067797 | 0.008215726 | 0.016045649 | 0.009950338 | 0.002817713 | 0.002646145  | 0.005981962  | 0.006632265 | 0.002981802  | 0.003839064 | 0.029908988  | 2.464072964 | 1.196    |
| Pyridoxal (Vitamin B6)                  | 168.0646313 | 101.041  | 0.035446242 | 0.07604563  | 0.026860255 | 0.057122672 | 0.085442512 | 0.039399869 | 0.021268283 | 0.0250024462 | 0.060888854  | 0.034952659 | 0.027279837  | 0.035420946 | 0.030315988  | 1.873911739 | 1.10951  |
| Ile-Val                                 | 231.1692436 | 188.918  | 0.000688244 | 0.02044411  | 0.007058344 | 0.002602684 | 0.002939035 | 0.003572885 | 0.000882636 | 0.001084043  | 0.000500084  | 0.001428509 | 0.00080928   | 0.000822128 | 0.030607252  | 3.420733967 | 0.963147 |
| Thiamine monophosphate                  | 345.0773979 | 498.3085 | 0.035087377 | 0.108481088 | 0.042337581 | 0.065170949 | 0.066373353 | 0.073229172 | 0.039165019 | 0.031978434  | 0.031096385  | 0.044188016 | 0.031459932  | 0.047117865 | 0.030654486  | 1.736309814 | 1.08725  |
| Terpineol                               | 172.1685691 | 223.377  | 0.003054442 | 0.126081468 | 0.006404753 | 0.058160671 | 0.107554258 | 0.043612719 | 0.000523674 | 0.000229529  | 0.000168504  | 0.024002222 | 0.00026762   | 0.000285057 | 0.030677878  | 13.53666619 | 1.30016  |
| D-Pipecolinic acid                      | 130.085743  | 501.593  | 0.01473536  | 0.040980972 | 0.018945156 | 0.014828949 | 0.031439491 | 0.01936278  | 0.011040047 | 0.01128359   | 0.017987295  | 0.012922271 | 0.01100736   | 0.031128313 | 1.896874651  | 1.22696     |          |
| Imidazoleacetic acid                    | 127.0499087 | 311.3315 | 0.024291935 | 0.145864958 | 0.029407749 | 0.038542793 | 0.105387537 | 0.05548204  | 0.01262668  | 0.010750105  | 0.012532251  | 0.036266381 | 0.01309554   | 0.00827084  | 0.031238586  | 4.265227148 | 1.26226  |
| Thymol                                  | 211.1314896 | 39.975   | 0.003553568 | 0.007558106 | 0.00356383  | 0.00604     |             |             |             |              |              |             |              |             |              |             |          |

|                                           |             |          |             |             |             |             |             |              |             |             |             |             |             |              |              |             |          |
|-------------------------------------------|-------------|----------|-------------|-------------|-------------|-------------|-------------|--------------|-------------|-------------|-------------|-------------|-------------|--------------|--------------|-------------|----------|
| Oxaprozoin                                | 276.1002803 | 285.629  | 0.001790187 | 0.034242553 | 0.01077454  | 0.017320185 | 0.030115989 | 0.011748468  | 0.002897534 | 0.001377992 | 0.008332789 | 0.009660254 | 0.002575097 | 0.004470501  | 0.034667321  | 3.615723483 | 1.08069  |
| PG(18:1/18:0)                             | 265.0024676 | 161.199  | 0.011254851 | 0.016249701 | 0.014215622 | 0.021438622 | 0.013406764 | 0.009226592  | 0.010413597 | 0.009393492 | 0.009771182 | 0.011615329 | 0.010027752 | 0.00840696   | 0.035212188  | 1.438782168 | 0.989304 |
| Graecunin D                               | 405.0751008 | 149.9985 | 0.01324128  | 0.036387154 | 0.01732064  | 0.027336983 | 0.035360891 | 0.014256568  | 0.007629532 | 0.010972098 | 0.018423327 | 0.016802023 | 0.00961966  | 0.013403623  | 0.035754037  | 1.872518198 | 1.10128  |
| DG(20:3/20:5/0:0)                         | 545.225941  | 480.4535 | 0.006177164 | 0.002911156 | 0.005386915 | 0.003486301 | 0.003428364 | 0.003038757  | 0.002633627 | 0.001614433 | 0.003108003 | 0.003271509 | 0.001778745 | 0.002921177  | 0.036020221  | 1.593780236 | 1.10268  |
| Palmitic acid                             | 274.2739097 | 85.602   | 6.975678428 | 11.91729944 | 5.610800203 | 7.757803066 | 12.93923686 | 8.677593041  | 6.624980491 | 6.001030227 | 6.081530447 | 6.954448143 | 5.71082334  | 5.06299803   | 0.036412185  | 1.478721361 | 1.0729   |
| 2-Amino-2-methyl-1,3-propanediol          | 211.1683755 | 36.66    | 0.003607159 | 0.012391222 | 0.021663708 | 0.007422291 | 0.021977896 | 0.01676049   | 0.020218552 | 0.03504967  | 0.018051809 | 0.017667136 | 0.026919668 | 0.025227445  | 0.036820038  | 0.585623276 | 0.994665 |
| Methylmalonic acid                        | 160.0592345 | 358.443  | 0.023098059 | 0.001871175 | 0.043682102 | 0.018380307 | 0.019622062 | 0.029757374  | 0.015448921 | 0.006518608 | 0.000633725 | 0.013409797 | 0.006843238 | 0.006394136  | 0.037169194  | 2.769856681 | 0.843574 |
| Myristic acid                             | 246.2419328 | 55.134   | 0.065682524 | 0.138085038 | 0.071594606 | 0.1047644   | 0.099647851 | 0.088220322  | 0.063848272 | 0.066092962 | 0.069788016 | 0.077547331 | 0.05202861  | 0.075498159  | 0.037271711  | 1.403137452 | 1.10077  |
| TG(20:2n6/o-18:0/22:5)                    | 378.0989649 | 229.3145 | 0.013754867 | 0.022878727 | 0.01631147  | 0.013655931 | 0.024195418 | 0.021569613  | 0.014168017 | 0.01510043  | 0.013310632 | 0.015636992 | 0.013404867 | 0.011905675  | 0.037482345  | 1.345272147 | 0.964278 |
| PE(18:3/P-16:0)                           | 314.1794414 | 249.388  | 0.004384213 | 0.005838194 | 0.002288453 | 0.005012544 | 0.004576867 | 0.003773075  | 0.002893285 | 0.00305449  | 0.002747217 | 0.003585799 | 0.002471474 | 0.003603846  | 0.0387199    | 1.409522202 | 0.966842 |
| (3-Carboxypropyl)trimethylammonium cation | 146.117505  | 367.2845 | 0.281859669 | 0.689177106 | 0.423654614 | 0.471645407 | 0.433838427 | 0.341444567  | 0.178120796 | 0.159713184 | 0.400582594 | 0.335418992 | 0.237975518 | 0.338669803  | 0.039220257  | 1.600515226 | 1.05558  |
| PC(16:0/24:1)                             | 614.3803883 | 47.613   | 0.003088982 | 0.005463658 | 0.003437054 | 0.003504706 | 0.005455551 | 0.003991282  | 0.001462683 | 0.002406984 | 0.004198792 | 0.003548325 | 0.002305022 | 0.002743973  | 0.039667622  | 1.496553686 | 1.05111  |
| PE(18:0/20:0)                             | 933.3115918 | 449.7    | 0.002253041 | 0.003847435 | 0.002000055 | 0.004922974 | 0.004202533 | 0.002637935  | 0.001277054 | 0.002507394 | 0.002832389 | 0.002492597 | 0.001609436 | 0.002408389  | 0.0339932961 | 1.639190656 | 1.06819  |
| Nicotine                                  | 163.1218289 | 92.1565  | 0.002337081 | 0.016872776 | 0.008745558 | 0.009377665 | 0.018077143 | 0.008397845  | 0.007360791 | 0.023234991 | 0.03630057  | 0.017495803 | 0.022414025 | 0.020733383  | 0.040572856  | 0.500300193 | 1.04384  |
| myo-Inositol                              | 198.0950375 | 407.4925 | 0.003217579 | 0.016079198 | 0.009476432 | 0.012764862 | 0.016570682 | 0.010149741  | 0.005022331 | 0.005765548 | 0.008256316 | 0.007990405 | 0.006634052 | 0.004863575  | 0.040672935  | 1.771465065 | 0.959668 |
| LysoPC(18:2)                              | 738.4968928 | 51.165   | 0.003564093 | 0.01205378  | 0.00360996  | 0.007089986 | 0.009176021 | 0.008239921  | 0.003394735 | 0.003325843 | 0.004933206 | 0.005450496 | 0.003204885 | 0.003671299  | 0.041020996  | 1.823724553 | 1.12521  |
| Ile-Pro                                   | 229.1538653 | 291.791  | 0.014175604 | 0.078268448 | 0.023658077 | 0.022730402 | 0.078128534 | 0.05722046   | 0.01427512  | 0.01149903  | 0.024093205 | 0.027954009 | 0.011602983 | 0.010361479  | 0.042137695  | 2.660946014 | 1.10799  |
| L-Phenylalanine                           | 166.085394  | 283.272  | 0.034610955 | 0.034001283 | 0.023692222 | 0.023663871 | 0.029568269 | 0.037360488  | 0.016946567 | 0.027150163 | 0.022154799 | 0.024969374 | 0.020078668 | 0.029449698  | 0.043531828  | 1.2994532   | 0.826139 |
| Gln-Asn                                   | 324.128194  | 396.9615 | 0.081121467 | 0.091581082 | 0.100366211 | 0.063832355 | 0.094269241 | 0.080620404  | 0.067943832 | 0.071764255 | 0.073283232 | 0.081127204 | 0.065524578 | 0.072579897  | 0.043690746  | 1.184089607 | 0.862709 |
| Lys-Val                                   | 246.1806803 | 507.9785 | 0.039911994 | 0.21202931  | 0.090123893 | 0.107379392 | 0.195542201 | 0.129383298  | 0.052865357 | 0.046094845 | 0.080868035 | 0.084206593 | 0.0492924   | 0.079643991  | 0.043904125  | 1.97055165  | 1.05142  |
| Tyr-Thr                                   | 282.1189449 | 135.5095 | 0.02464979  | 0.007532435 | 0.021697318 | 0.011007971 | 0.015318703 | 0.0074451028 | 0.007202708 | 0.004095695 | 0.012821559 | 0.012082084 | 0.006139063 | 0.011127355  | 0.044305799  | 1.774078361 | 1.00372  |
| TTNPB                                     | 387.1683909 | 281.173  | 0.012497627 | 0.015749371 | 0.009569278 | 0.019604916 | 0.011605198 | 0.010014512  | 0.008625944 | 0.009057728 | 0.005484589 | 0.009772398 | 0.009043388 | 0.012227439  | 0.044500398  | 1.458010245 | 0.869525 |
| Geranylgeraniol                           | 255.2495649 | 39.093   | 0.012747151 | 0.032994396 | 0.402885171 | 0.219145919 | 0.120606349 | 0.128017757  | 0.009705862 | 0.011020666 | 0.013488629 | 0.047354473 | 0.012825784 | 0.015661773  | 0.045246607  | 8.32655066  | 1.02993  |
| PS(18:2/14:0)                             | 625.098937  | 439.71   | 0.087026453 | 0.204798149 | 0.108819173 | 0.164208609 | 0.205104314 | 0.134514701  | 0.106015252 | 0.090247801 | 0.05022378  | 0.127273603 | 0.10835243  | 0.090838888  | 0.045528103  | 1.464137408 | 1.07108  |
| PE(24:0/22:1)                             | 532.3834829 | 40.633   | 0.025808    | 0.038179733 | 0.023657287 | 0.031732577 | 0.033699513 | 0.034906515  | 0.011815585 | 0.012165686 | 0.03751125  | 0.027210591 | 0.014116579 | 0.020447489  | 0.046247182  | 1.525009536 | 1.07522  |
| PE(16:0/20:2)                             | 797.5186038 | 85.6175  | 0.011976959 | 0.026153289 | 0.013135669 | 0.019015702 | 0.025522924 | 0.013547112  | 0.009858318 | 0.010818647 | 0.014514259 | 0.014304505 | 0.00844112  | 0.013250629  | 0.046475745  | 1.536108008 | 1.09274  |
| N,N'-Diacytichitobiose                    | 407.1650475 | 439.1515 | 0.374620328 | 1.137550511 | 0.308836566 | 0.942601508 | 0.729592055 | 0.477376388  | 0.351578678 | 0.282254709 | 0.28968405  | 0.451688274 | 0.348633176 | 0.381058886  | 0.047765602  | 1.886351635 | 1.06481  |
| Asparaginy-L-Glutamine                    | 1160.413428 | 415.7165 | 1.77E-05    | 0.006156283 | 0.002546186 | 3.54E-03    | 0.003956966 | 2.67E-03     | 0.002082738 | 0.00584557  | 0.001101739 | 0.001922455 | 0.000745585 | 0.0080802138 | 0.048048822  | 2.609004267 | 0.648356 |
| L-Alanine                                 | 90.0551742  | 337.6505 | 0.029713655 | 0.041670691 | 0.029975476 | 0.044028155 | 0.030661134 | 0.031710213  | 0.031701559 | 0.024211254 | 0.027264474 | 0.030286291 | 0.03050093  | 0.023452726  | 0.048457996  | 1.240967367 | 0.961099 |
| Undecanedioic acid                        | 258.169268  | 220.7515 | 0.022297161 | 0.089050987 | 0.030405439 | 0.101583498 | 0.0698014   | 0.033254585  | 0.009270728 | 0.008943165 | 0.053126374 | 0.035788871 | 0.013208854 | 0.018894162  | 0.050224574  | 2.487881284 | 1.10839  |
| PE(20:4/18:1)                             | 813.6572437 | 31.692   | 0.002595723 | 0.004606103 | 0.001362537 | 0.006332085 | 0.003790488 | 0.003674602  | 0.001661368 | 0.002600802 | 0.00171023  | 0.002532926 | 0.002301005 | 0.002052191  | 0.05057437   | 1.739044192 | 0.893172 |
| Ala-Leu                                   | 263.1594781 | 376.12   | 0.0055686   | 0.003120979 | 0.005045633 | 0.00567333  | 0.004417352 | 0.002968904  | 0.001465994 | 0.001919573 | 0.00509455  | 0.00354746  | 0.002499848 | 0.00270321   | 0.050953591  | 1.555067355 | 0.944188 |
| 5-Hydroxymethylcytidine                   | 274.10074   | 406.218  | 0.003212792 | 0.007480913 | 0.004595296 | 0.003973282 | 0.007295546 | 0.004469196  | 0.003555709 | 0.00333971  | 0.003706981 | 0.004494929 | 0.003111597 | 0.002567625  | 0.052035997  | 1.493367451 | 1.05206  |
| 4-Pyridoxic acid                          | 184.0592909 | 43.977   | 0.055028648 | 0.092508552 | 0.038103361 | 0.075187914 | 0.090435445 | 0.050066649  | 0.041617573 | 0.038545208 | 0.059424931 | 0.053334137 | 0.035561541 | 0.041367962  | 0.052063401  | 1.487228306 | 1.06398  |
| PE(20:5/20:4)                             | 712.6370049 | 328.522  | 0.003104209 | 0.016153655 | 0.007416402 | 0.018710015 | 0.012427115 | 0.012112877  | 0.00487414  | 0.005794262 | 0.007945388 | 0.007822917 | 0.005907537 | 0.006237214  | 0.0525156    | 1.812380263 | 0.931381 |
| N6,N6,N6-Trimethyl-L-lysine               | 189.1592971 | 506.209  | 0.013600125 | 0.039538229 | 0.017829937 | 0.011875485 | 0.047400402 | 0.023308392  | 0.010326164 | 0.010564081 | 0.015500549 | 0.017384748 | 0.011590138 | 0.006930552  | 0.052670603  | 2.123936003 | 1.04534  |
| PE(14:1/P-18:0)                           | 1029.405111 | 476.1245 | 0.002676352 | 0.004391826 | 0.002574384 | 0.00260842  | 0.003849263 | 0.002376412  | 0.002933494 | 0.001539193 | 0.002121415 | 0.002597953 | 0.002166546 | 0.001917822  | 0.052683973  | 1.391689388 | 1.013    |
| Urea                                      | 61.04102144 | 109.22   | 0.006531228 | 0.010954577 | 0.006344075 | 0.006336389 | 0.007666908 | 0.006579638  | 0.005907303 | 0.005494599 | 0.005527258 | 0.006104916 | 0.005487328 | 0.006029124  | 0.052711144  | 1.28545092  | 1.02518  |
| TG(14:0/18:1/14:1)                        | 806.5626398 | 135.4205 | 0.007350918 | 0.019548459 | 0.009170516 | 0.023437106 | 0.020594488 | 0.014016268  | 0.005968043 | 0.009578454 | 0.012945126 | 0.011377108 | 0.009963447 | 0.006261866  | 0.053741179  | 1.677856476 | 0.989745 |
| LysoPE(18:2/0:0)                          | 1040.39789  | 376.767  | 0.00218485  | 0.006452702 | 0.002265403 | 0.003072759 | 0.004632094 | 0.004132239  | 0.001382448 | 0.002258956 | 0.002971343 | 0.002779213 | 0.00218539  | 0.001891276  | 0.053877234  | 1.688371702 | 1.06864  |
| Cyclohexylamine                           | 160.1327996 | 373.819  | 0.064913829 | 0.117820584 | 0.059866745 | 0.052840496 | 0.140410862 | 0.057099214  | 0.019152148 | 0.023770239 | 0.085175745 | 0.058314689 | 0.028304365 | 0.037760481  | 0.054215963  | 1.952456769 | 1.07397  |
| D-Fructose-6-phosphate                    | 324.0451984 | 442.2405 | 0.160085722 | 0.29351383  | 0.187153777 | 0.194744717 | 0.32561733  | 0.203742124  | 0.16307329  | 0.156741547 | 0.147301902 | 0.188119909 | 0.174912238 | 0.175201024  | 0.055191161  | 1.357594492 | 1.01525  |
| LysoPC(17:0)                              | 683.3801196 | 343.6645 | 0.01337868  | 0.029319657 | 0.01649581  | 0.017307833 | 0.02365527  | 0.020677787  | 0.007003956 | 0.007431114 | 0.02139869  | 0.018140577 | 0.011145639 | 0.012499444  | 0.036080852  | 1.556762947 | 1.07145  |
| DG(22:2/24:0/0:0)                         | 1163.214082 | 415.398  | 1.77E-05    | 0.005996346 | 0.001679084 | 5.82E-03    | 0.004772303 | 2.78E-03     | 0.001896464 | 0.001087545 | 0.000930598 | 0.001996217 | 0.001244414 | 0.000857183  | 0.056023204  | 2.629097123 | 0.656492 |
| 1-Stearoyl-sn-glycerol 3-phosphoch        |             |          |             |             |             |             |             |              |             |             |             |             |             |              |              |             |          |

|                                                    |             |          |             |             |             |             |             |             |             |             |             |             |             |             |             |             |          |
|----------------------------------------------------|-------------|----------|-------------|-------------|-------------|-------------|-------------|-------------|-------------|-------------|-------------|-------------|-------------|-------------|-------------|-------------|----------|
| PC(14:0/14:0)                                      | 667.4064643 | 344.0455 | 0.007336756 | 0.014449128 | 0.008268171 | 0.013523711 | 0.010619859 | 0.008665581 | 0.004035529 | 0.004450325 | 0.011594638 | 0.008445419 | 0.006523771 | 0.007617499 | 0.069292095 | 1.47333863  | 1.00602  |
| PE(18:1/18:2)                                      | 590.610845  | 328.1055 | 0.003094966 | 0.012494614 | 0.007521645 | 0.015468204 | 0.006804661 | 0.009409531 | 0.004775057 | 0.004535883 | 0.006725429 | 0.006319588 | 0.004259652 | 0.005797362 | 0.069680527 | 1.690484374 | 0.874787 |
| Phe-Asp                                            | 281.1063856 | 241.676  | 0.052129125 | 0.015697085 | 0.038095641 | 0.043332604 | 0.026042382 | 0.025672667 | 0.005894258 | 0.006916919 | 0.040015449 | 0.028402559 | 0.012447693 | 0.012293887 | 0.069717138 | 1.896461765 | 0.997464 |
| PC(22:5/P-18:1)                                    | 768.694215  | 328.4355 | 0.002647754 | 0.012044848 | 0.007194877 | 0.006420674 | 0.010447478 | 0.007379989 | 0.004500398 | 0.004244372 | 0.006174039 | 0.005970967 | 0.004832314 | 0.003132894 | 0.069795018 | 1.598878724 | 0.92204  |
| N-Acetylnesauraminic acid                          | 310.1112468 | 283.014  | 0.017015916 | 0.018996561 | 0.01694543  | 0.037175153 | 0.016722043 | 0.016389662 | 0.005533983 | 0.013414145 | 0.005355661 | 0.008039197 | 0.012479138 | 0.014379138 | 0.07240752  | 1.645970661 | 0.964651 |
| PE(16:1/14:1)                                      | 652.6189017 | 328.523  | 0.002862234 | 0.008252966 | 0.005572173 | 0.007312947 | 0.006346107 | 0.004564356 | 0.003400642 | 0.003051146 | 0.005057625 | 0.004986726 | 0.002758069 | 0.004806746 | 0.072545769 | 1.450930956 | 0.968559 |
| Ile-Asn                                            | 284.1060539 | 378.7995 | 0.047303254 | 0.07869874  | 0.048485699 | 0.052832675 | 0.04229002  | 0.062971902 | 0.044576553 | 0.036537278 | 0.037446735 | 0.047183436 | 0.048488752 | 0.047750215 | 0.072945016 | 1.269480575 | 0.854432 |
| Fisetinidol                                        | 292.124237  | 366.22   | 0.004005519 | 0.011695451 | 0.007369066 | 0.013155566 | 0.010420485 | 0.005865364 | 0.00777039  | 0.000388926 | 0.005936308 | 0.006263134 | 0.002838925 | 0.007010988 | 0.073508155 | 1.738290672 | 0.819944 |
| PE(22:6/15:0)                                      | 136.0215306 | 618.278  | 0.057391724 | 0.208140872 | 0.087317077 | 0.152536941 | 0.201412501 | 0.122689307 | 0.045480688 | 0.091919669 | 0.109502455 | 0.102757115 | 0.09336597  | 0.067303707 | 0.074194191 | 1.625397421 | 0.969806 |
| Nitrosobenzene                                     | 125.0706993 | 150.72   | 0.016565584 | 0.024078468 | 0.014124376 | 0.018991582 | 0.024182469 | 0.021236184 | 0.008797335 | 0.01760876  | 0.019283805 | 0.017127869 | 0.016334801 | 0.012610763 | 0.074500334 | 1.298761271 | 0.882986 |
| Arecoline                                          | 216.1211675 | 232.377  | 0.003625455 | 0.007484267 | 0.001423949 | 0.003460662 | 0.007783611 | 0.004492    | 0.00188773  | 0.002841599 | 0.002688575 | 0.003366338 | 0.002693938 | 0.002479794 | 0.074584901 | 1.771524631 | 0.910969 |
| PE(16:0/18:3)                                      | 668.7390778 | 328.4355 | 0.002934957 | 0.011939955 | 0.007173575 | 0.00701486  | 0.009523466 | 0.008755253 | 0.004407915 | 0.00407439  | 0.006625787 | 0.006021173 | 0.004005557 | 0.006355545 | 0.07490914  | 1.503382479 | 0.926912 |
| PE(22:4/P-18:1)                                    | 472.7841966 | 328.1055 | 0.011833774 | 0.048011157 | 0.027684834 | 0.027679609 | 0.039664831 | 0.033672702 | 0.01877712  | 0.017947313 | 0.024409394 | 0.025498065 | 0.019536832 | 0.020490438 | 0.074994716 | 1.4885741   | 0.947076 |
| PC(18:1/18:3)                                      | 810.269126  | 377.4275 | 0.046838524 | 0.143577822 | 0.086339726 | 0.095200346 | 0.1202757   | 0.060148154 | 0.054746358 | 0.053381419 | 0.078514212 | 0.073277026 | 0.055278815 | 0.052647479 | 0.07542817  | 1.501664582 | 0.986279 |
| PC(22:4/20:2)                                      | 730.5359026 | 51.1685  | 0.018324598 | 0.051695419 | 0.035864205 | 0.042191357 | 0.038489625 | 0.032581702 | 0.012181561 | 0.017290225 | 0.042656964 | 0.028401747 | 0.022552206 | 0.021756206 | 0.07574611  | 1.513038917 | 0.954966 |
| PA(16:0/18:2)                                      | 350.1444326 | 444.806  | 0.012405506 | 0.039782828 | 0.014874098 | 0.022168403 | 0.026482984 | 0.02772144  | 0.017022723 | 0.01282658  | 0.01476355  | 0.019260145 | 0.011156408 | 0.018025145 | 0.075869383 | 1.541410468 | 1.01476  |
| n-Propyl cinnamate                                 | 208.1316679 | 175.749  | 0.002947988 | 0.009961888 | 0.003112709 | 0.007674748 | 0.006974766 | 0.005429711 | 0.001816361 | 0.001405036 | 0.006732734 | 0.004162473 | 0.002362602 | 0.003319975 | 0.086161837 | 1.82339916  | 1.05263  |
| 3-(2-Hydroxyphenyl)propionic acid                  | 355.107849  | 59.9425  | 0.006551137 | 0.015184181 | 0.009645119 | 0.017294807 | 0.010358033 | 0.010973314 | 0.007867538 | 0.00903008  | 0.00864443  | 0.008888416 | 0.009599885 | 0.006455527 | 0.078490572 | 1.386656953 | 0.848809 |
| Acetyl-DL-Valine                                   | 357.1495483 | 501.591  | 0.016625591 | 0.013131043 | 0.02013946  | 0.011928248 | 0.013536008 | 0.020258304 | 0.042409363 | 0.016199195 | 0.018912682 | 0.022756383 | 0.023460382 | 0.020233651 | 0.078689784 | 0.664149157 | 0.841028 |
| PE(18:2/15:0)                                      | 828.2114882 | 451.884  | 0.003645381 | 0.007888691 | 0.005332519 | 0.003513569 | 0.007765189 | 0.006730641 | 0.002603852 | 0.003707722 | 0.005535999 | 0.005002161 | 0.003465662 | 0.003883807 | 0.079164646 | 1.441204076 | 0.921124 |
| Cer(d18:0/16:0)                                    | 547.1236306 | 473.205  | 0.004534257 | 0.001518967 | 0.002811211 | 0.002021197 | 0.00166348  | 0.002089395 | 0.001071856 | 0.001019353 | 0.002032364 | 0.002035869 | 0.001200291 | 0.001478823 | 0.07925731  | 1.656210245 | 1.07033  |
| N-Acetylglucosamine 1-phosphate                    | 302.0628749 | 437.545  | 0.023681431 | 0.065502986 | 0.035089134 | 0.041715449 | 0.040673938 | 0.039975346 | 0.023417828 | 0.026518957 | 0.030982789 | 0.037168728 | 0.031707487 | 0.027404357 | 0.079300306 | 1.391862758 | 1.03261  |
| PC(14:1/22:2)                                      | 186.2208538 | 151.1095 | 0.015301983 | 0.031605219 | 0.014381131 | 0.018061257 | 0.024865585 | 0.020808562 | 0.015025485 | 0.013892179 | 0.012163628 | 0.017185383 | 0.015093879 | 0.018639566 | 0.079662594 | 1.35895189  | 0.966898 |
| Diethyl phthalate                                  | 391.282131  | 32.6305  | 0.007444423 | 0.018379975 | 0.009624862 | 0.011436133 | 0.016400262 | 0.008965281 | 0.009876514 | 0.005693282 | 0.008896353 | 0.009900829 | 0.00781336  | 0.007830457 | 0.080019065 | 1.444706808 | 1.01727  |
| L-NG-Monomethylarginine                            | 189.1343932 | 493.215  | 0.022766048 | 0.094323693 | 0.056970209 | 0.057689607 | 0.098652777 | 0.048886395 | 0.037935823 | 0.023126753 | 0.047796907 | 0.04617189  | 0.020886496 | 0.052265864 | 0.080032139 | 1.662207573 | 0.93538  |
| 1-Methylhistidine                                  | 170.0917271 | 357.63   | 0.238002924 | 0.250571637 | 0.170941897 | 0.298405761 | 0.445112848 | 0.264033797 | 0.088939038 | 0.233414188 | 0.255593475 | 0.213288554 | 0.189487898 | 0.164597324 | 0.080346771 | 1.455547943 | 0.832918 |
| PE(P-18:1/20:5)                                    | 136.9394306 | 328.2825 | 0.009401336 | 0.049331989 | 0.026983395 | 0.029371605 | 0.041968647 | 0.036250847 | 0.018142777 | 0.017357952 | 0.024707718 | 0.026016415 | 0.018350503 | 0.02047507  | 0.080602108 | 1.545838837 | 0.906341 |
| PE(18:2/15:0)                                      | 488.1441842 | 392.93   | 0.007479837 | 0.010035969 | 0.011486822 | 0.017656839 | 0.007366436 | 0.00855979  | 0.003129983 | 0.008562902 | 0.008447703 | 0.007337506 | 0.007740715 | 0.006627375 | 0.081300464 | 1.495612909 | 0.723927 |
| Diethanolamine                                     | 106.0863588 | 318.281  | 0.007732816 | 0.013837461 | 0.00735907  | 0.009333493 | 0.011261451 | 0.010814523 | 0.007282979 | 0.009718481 | 0.005641734 | 0.008528355 | 0.009177647 | 0.005939662 | 0.081867292 | 1.303527817 | 0.819153 |
| Deoxycytidine                                      | 228.0996439 | 250.3295 | 0.000999689 | 0.003906465 | 0.002441762 | 0.002646051 | 0.004037937 | 0.002975626 | 0.001878633 | 0.000818129 | 0.002826664 | 0.002117852 | 0.001138062 | 0.001986475 | 0.08327614  | 1.579771713 | 0.919757 |
| 1,2-dioleoyl-sn-glycero-3-phosphatidylethanolamine | 786.5968728 | 135.4745 | 0.07060816  | 0.230015472 | 0.085048553 | 0.075841468 | 0.192847216 | 0.123360572 | 0.050136192 | 0.060480087 | 0.084249227 | 0.098986256 | 0.074965433 | 0.082541407 | 0.083510135 | 1.723067728 | 1.02231  |
| cis-9-Palmitoleic acid                             | 237.2201799 | 40.655   | 0.009944071 | 0.002518733 | 0.012193231 | 0.010274441 | 0.003968034 | 0.008191218 | 0.008831392 | 0.013028377 | 0.01299041  | 0.009193045 | 0.011962689 | 0.010979274 | 0.08383966  | 0.702937024 | 0.933187 |
| PS(18:3/14:1)                                      | 804.5464441 | 135.4205 | 0.00206604  | 0.009303864 | 0.003277482 | 0.010439739 | 0.007846636 | 0.00459483  | 0.001959428 | 0.004128054 | 0.004573141 | 0.004304017 | 0.003534913 | 0.002259727 | 0.085976972 | 1.807798296 | 0.918013 |
| Ethyl hydrogen malonate                            | 287.0751503 | 283.3865 | 0.014967184 | 0.060215415 | 0.043254774 | 0.044293736 | 0.037876266 | 0.027815657 | 0.014405432 | 0.037234379 | 0.012635029 | 0.02667251  | 0.030417794 | 0.022565596 | 0.086108815 | 1.587034375 | 0.688062 |
| LysoPC(22:4)                                       | 744.5486811 | 51.183   | 0.039641143 | 0.097187534 | 0.034761936 | 0.043556723 | 0.066287061 | 0.058892356 | 0.038339717 | 0.011135988 | 0.054569975 | 0.048029263 | 0.025169938 | 0.032825348 | 0.086592033 | 1.620061798 | 0.995027 |
| Butoxyacetic acid                                  | 132.0806718 | 248.345  | 0.064446437 | 0.001059638 | 0.043611208 | 0.046681972 | 0.026776817 | 0.042121203 | 0.002215692 | 0.000973738 | 0.046398006 | 0.025465106 | 0.008066425 | 0.014630472 | 0.089741771 | 2.298706543 | 0.698198 |
| (-)-Tylocrebrine                                   | 457.2012276 | 480.44   | 0.234910433 | 0.174720815 | 0.337017393 | 0.217607365 | 0.234385203 | 0.210672269 | 0.183606778 | 0.302816426 | 0.348496608 | 0.262670762 | 0.342850104 | 0.449275028 | 0.09104949  | 0.745780687 | 0.823752 |
| PE(14:0/18:2)                                      | 766.5291637 | 51.193   | 0.007268729 | 0.017701958 | 0.008346582 | 0.008299886 | 0.011503507 | 0.011862725 | 0.005831884 | 0.006033415 | 0.010909979 | 0.008790618 | 0.006714793 | 0.007054879 | 0.092563023 | 1.33386409  | 1.02626  |
| Lunarine                                           | 482.2057971 | 414.8435 | 0.007453417 | 0.002498965 | 0.006433301 | 0.004268815 | 0.003920609 | 0.005224544 | 0.002992319 | 0.00845967  | 0.008863941 | 0.006195549 | 0.009181341 | 0.007474124 | 0.09284677  | 0.69033497  | 0.771168 |
| PG(18:1/18:1)                                      | 572.7417398 | 328.2825 | 0.006114764 | 0.031077923 | 0.014789556 | 0.019900392 | 0.025928608 | 0.016371308 | 0.011534029 | 0.010927654 | 0.014382309 | 0.014670064 | 0.011870015 | 0.010094129 | 0.093829931 | 1.553964999 | 0.931266 |
| Val-Asp                                            | 277.0826416 | 378.096  | 0.001454579 | 0.006121797 | 0.004529325 | 0.005412373 | 0.005522057 | 0.004449658 | 0.001533326 | 0.001426479 | 0.005038481 | 0.003971213 | 0.002210585 | 0.003428262 | 0.096905079 | 1.561179511 | 0.90489  |
| SM(d16:1/24:1)                                     | 244.262866  | 118.971  | 0.018549119 | 0.036512309 | 0.0143698   | 0.024872064 | 0.031165263 | 0.019517853 | 0.01691469  | 0.018563414 | 0.017687812 | 0.021040934 | 0.015532932 | 0.016728144 | 0.097175139 | 1.361784844 | 0.994231 |
| 3-Methylhistamine                                  | 170.0627198 | 365.991  | 0.007054364 | 0.00987104  | 0.006412009 | 0.003031755 | 0.013808289 | 0.007481471 | 0.003824218 | 0.00356139  | 0.349252877 | 0.008257731 | 0.060698721 | 0.129474861 | 0.097599948 | 0.744545894 | 0.664681 |
| Dopamine                                           | 217.0948365 | 62.9185  | 0.006737349 | 0.015293474 | 0.003012128 | 0.007074071 | 0.012544921 | 0.009644636 | 0.001619099 | 0.007568367 | 0.005176359 | 0.006622941 | 0.006985506 | 0.0043318   |             |             |          |

|                                                 |             |          |             |             |             |             |             |             |             |             |             |              |             |             |             |             |          |
|-------------------------------------------------|-------------|----------|-------------|-------------|-------------|-------------|-------------|-------------|-------------|-------------|-------------|--------------|-------------|-------------|-------------|-------------|----------|
| TG(14:0/16:0/16:0)                              | 506.1512404 | 392.9215 | 0.047232222 | 0.038745451 | 0.051774824 | 0.071852998 | 0.035645002 | 0.058610988 | 0.017180463 | 0.044483351 | 0.04713913  | 0.038578377  | 0.047475148 | 0.034551952 | 0.115346908 | 1.324543727 | 0.606197 |
| Tyramine                                        | 120.0802968 | 247.3765 | 0.120456034 | 0.092224977 | 0.075729359 | 0.070302757 | 0.095675224 | 0.091184684 | 0.053659482 | 0.07745368  | 0.088791517 | 0.082347044  | 0.066025738 | 0.084501274 | 0.116319496 | 1.204944033 | 0.739263 |
| TG(14:0/15:0/20:4)                              | 257.1467085 | 264.6785 | 0.061977118 | 0.064851859 | 0.072206182 | 0.093839277 | 0.080871496 | 0.067818915 | 0.023896974 | 0.024960138 | 0.10834309  | 0.063435105  | 0.030866655 | 0.044364569 | 0.116647939 | 1.492446089 | 0.96982  |
| 2'-O-methylcytidine                             | 258.1088867 | 252.165  | 0.003028681 | 0.0084382   | 0.004232404 | 0.004238245 | 0.00817827  | 0.004722121 | 0.004306438 | 0.002955721 | 0.003943056 | 0.004493677  | 0.002906447 | 0.004254902 | 0.117009763 | 1.43646434  | 0.961524 |
| Minoxidil                                       | 457.2268996 | 464.514  | 0.006197831 | 0.000869077 | 0.008814223 | 0.003961861 | 0.002840514 | 0.004622859 | 0.004793326 | 0.006313287 | 0.005822781 | 0.005810208  | 0.006369726 | 0.008026565 | 0.117701999 | 0.666865389 | 0.883004 |
| Cytosine                                        | 112.0502169 | 172.877  | 0.006585809 | 0.015137589 | 0.006508115 | 0.005359647 | 0.009040405 | 0.005619334 | 0.004193757 | 0.004740832 | 0.006530396 | 0.007080877  | 0.005377214 | 0.004067978 | 0.120798949 | 1.508262247 | 0.96937  |
| 1-Stearoyl-2-oleoyl-sn-glycerol 3-phosphocholin | 810.5993918 | 51.164   | 0.008317605 | 0.029107031 | 0.008498128 | 0.01263854  | 0.024596268 | 0.012568945 | 0.004524743 | 0.008887155 | 0.012551921 | 0.011981865  | 0.01023936  | 0.009437069 | 0.122492654 | 1.661280922 | 0.974112 |
| PC(o-14:0/16:0)                                 | 750.6139675 | 327.91   | 0.0021758   | 0.008434381 | 0.004692887 | 0.004224092 | 0.00671871  | 0.004464792 | 0.003001045 | 0.00325703  | 0.004183467 | 0.004421186  | 0.003623062 | 0.002882863 | 0.122925391 | 1.437182868 | 0.929175 |
| TG(20:1/20:2n6/22:5)                            | 1157.355671 | 393.477  | 0.012939545 | 0.005721209 | 0.008418161 | 0.015290228 | 0.008371446 | 0.008268911 | 0.005642637 | 0.007646549 | 0.008452606 | 0.00868118   | 0.007331389 | 0.005613486 | 0.122926065 | 1.360673957 | 0.841929 |
| N2-Acetyl-L-ornithine                           | 175.1067371 | 359.56   | 0.057662224 | 0.076311534 | 0.071420447 | 0.074496823 | 0.088802011 | 0.053376575 | 0.038332885 | 0.048126207 | 0.090761314 | 0.063356246  | 0.044182421 | 0.037435426 | 0.123162637 | 1.309983924 | 0.907384 |
| PE(24:0/18:0)                                   | 453.1702935 | 434.7705 | 0.362791358 | 0.35750206  | 0.374470007 | 0.236717701 | 0.245240363 | 0.351435518 | 0.223010378 | 0.242333172 | 0.301891459 | 0.284193524  | 0.197588464 | 0.33987287  | 0.123280647 | 1.213524642 | 0.697715 |
| D-gluconate                                     | 238.0922843 | 430.2    | 0.004549904 | 0.00355858  | 0.010952494 | 0.008550069 | 0.00595127  | 0.005301192 | 0.004120558 | 0.005478472 | 0.00542916  | 0.004726939  | 0.003946053 | 0.003380132 | 0.127143535 | 1.435067331 | 0.671474 |
| TG(16:1/18:3/20:1)                              | 478.4611388 | 34.3205  | 0.001580351 | 0.003934802 | 0.00500435  | 0.003988066 | 0.003877406 | 0.003962197 | 0.004122899 | 0.001948676 | 0.002297719 | 0.002997315  | 0.002725366 | 0.002811482 | 0.137202021 | 1.319705244 | 0.590606 |
| PC(o-16:1/16:1)                                 | 702.4642291 | 44.324   | 0.01206541  | 0.026930877 | 0.016168979 | 0.013272067 | 0.022129319 | 0.015840186 | 0.017253742 | 0.000631533 | 0.019779157 | 0.015289877  | 0.006676738 | 0.010643482 | 0.138527645 | 1.514159391 | 0.778544 |
| Stearidonic Acid                                | 277.2216609 | 86.035   | 0.001969735 | 0.003994542 | 0.000870992 | 0.00220723  | 0.002269409 | 0.002250142 | 0.000833588 | 0.002040899 | 0.00102366  | 0.00186707   | 0.001944402 | 0.001419666 | 0.138687814 | 1.485554455 | 0.742381 |
| Pantothenol                                     | 206.1384574 | 79.751   | 0.002092075 | 0.003730927 | 0.000431329 | 0.002572952 | 0.00364042  | 0.00216402  | 0.001426802 | 0.002146053 | 0.016476231 | 0.005454266  | 0.003805482 | 0.007416473 | 0.14285637  | 0.39886106  | 0.735401 |
| Methyl acetoacetate                             | 134.0807172 | 338.016  | 0.006279144 | 0.019578338 | 0.013265277 | 0.012069819 | 0.014139712 | 0.010346802 | 0.008378796 | 0.011780083 | 0.007090199 | 0.010498739  | 0.008703988 | 0.00262782  | 0.144292387 | 1.321245791 | 0.734535 |
| Sparfloxacin                                    | 469.0785896 | 475.214  | 0.015629922 | 0.022739124 | 0.014888114 | 0.016246116 | 0.016500085 | 0.018453916 | 0.010820366 | 0.014541165 | 0.016708217 | 0.015489619  | 0.01731097  | 0.015360328 | 0.145018834 | 1.157669369 | 0.794267 |
| Sphingomyelin (d18:1/18:0)                      | 731.5975919 | 31.245   | 0.003543191 | 0.009845397 | 0.003144668 | 0.004366417 | 0.009183315 | 0.004836839 | 0.001812195 | 0.003292205 | 0.005314531 | 0.004746258  | 0.003627761 | 0.003863266 | 0.145765185 | 1.541291229 | 0.951036 |
| TG(24:0/20:1/24:0)                              | 680.4780618 | 31.914   | 0.003101023 | 0.051234499 | 0.028572798 | 0.033489689 | 0.041045083 | 0.03128796  | 0.029077692 | 0.02370985  | 0.036217656 | 0.033626701  | 0.023233606 | 0.031420728 | 0.152937035 | 1.216858892 | 0.976204 |
| Primaquine                                      | 541.333176  | 266.02   | 0.004299101 | 0.004808721 | 0.004475925 | 0.00910448  | 0.010090418 | 0.01520126  | 0.005014274 | 0.002396753 | 0.008224588 | 0.007753162  | 0.003473628 | 0.004034531 | 0.153055358 | 2.782797136 | 0.81031  |
| 7,8-Dihydro- $\alpha$ -ionone                   | 255.1931389 | 32.8435  | 0.002033631 | 0.008567712 | 0.00397631  | 0.004285829 | 0.008991214 | 0.003450204 | 0.001829915 | 0.004629491 | 0.002597807 | 0.003908111  | 0.004397743 | 0.002311789 | 0.156835043 | 1.591112026 | 0.792036 |
| TG(20:1/20:1/20:1)                              | 602.2484882 | 433.516  | 0.005626262 | 0.005458622 | 0.006653355 | 0.00378719  | 0.005601866 | 0.005551056 | 0.004162272 | 0.004730216 | 0.005345267 | 0.004780729  | 0.005557992 | 0.003917221 | 0.159736918 | 1.146862445 | 0.530467 |
| Arg-Tyr                                         | 376.1443063 | 419.892  | 0.014239308 | 0.043807603 | 0.032447361 | 0.018182402 | 0.048302429 | 0.039802818 | 0.021951579 | 0.02434075  | 0.019724381 | 0.025906664  | 0.029147845 | 0.022866396 | 0.162390094 | 1.3671334   | 0.651179 |
| Lys-Leu                                         | 260.1963031 | 508.453  | 0.005088894 | 0.010808274 | 0.006271236 | 0.010253066 | 0.008847409 | 0.006789896 | 0.004411725 | 0.004332577 | 0.007784603 | 0.006520841  | 0.006032409 | 0.008418634 | 0.162448901 | 1.28154037  | 0.882756 |
| PC(o-16:0/18:0)                                 | 784.5818282 | 94.752   | 0.148863663 | 0.441873307 | 0.17893284  | 0.317108147 | 0.306959612 | 0.203839645 | 0.093779868 | 0.1481931   | 0.283187915 | 0.2195425    | 0.173002344 | 0.209913744 | 0.16406062  | 1.416769801 | 0.931018 |
| Bupropion                                       | 281.1471513 | 295.576  | 0.007497496 | 0.007025948 | 0.013584944 | 0.006188092 | 0.005783151 | 0.007874181 | 0.007684541 | 0.006641828 | 0.001939579 | 0.006300685  | 0.006533764 | 0.006085781 | 0.165265652 | 1.362859359 | 0.6563   |
| PE(20:1/15:0)                                   | 379.0851663 | 24.606   | 0.000468172 | 0.002609138 | 0.001233938 | 0.001350479 | 0.001677715 | 0.001520459 | 0.000750486 | 0.000479769 | 0.001766473 | 0.001290893  | 0.000701455 | 0.000788969 | 0.166105236 | 1.533373485 | 0.925558 |
| TG(14:0/22:6/18:4)                              | 363.089624  | 313.281  | 0.70387086  | 1.140045976 | 0.667760085 | 0.549756804 | 0.970974125 | 0.975679034 | 0.658081137 | 0.701240521 | 0.630069766 | 0.773546342  | 0.688741006 | 0.715437171 | 0.170420565 | 1.201811265 | 0.734804 |
| SM(d19:1/24:1)                                  | 333.0784024 | 203.597  | 0.022651295 | 0.045868161 | 0.03636865  | 0.031156953 | 0.026754782 | 0.038073622 | 0.031992093 | 0.024465424 | 0.024100464 | 0.031936205  | 0.032915042 | 0.018765059 | 0.171383979 | 1.223537904 | 0.666732 |
| Perolryline                                     | 694.5591905 | 31.7885  | 0.007312951 | 0.025105172 | 0.007696596 | 0.016747549 | 0.023339644 | 0.012547399 | 0.003358685 | 0.005808632 | 0.01922852  | 0.012599562  | 0.008231403 | 0.009364208 | 0.171763619 | 1.582995599 | 0.947284 |
| TG(16:0/14:1/18:2)                              | 818.6080329 | 31.634   | 0.001972988 | 0.004584071 | 0.002377962 | 0.002976026 | 0.002948958 | 0.003188526 | 0.001526606 | 0.002223094 | 0.003380237 | 0.002596517  | 0.002309494 | 0.002142147 | 0.174744119 | 1.272987027 | 0.909596 |
| PE(15:0/14:0)                                   | 298.3093671 | 38.629   | 0.032176764 | 0.05697894  | 0.04792377  | 0.030369875 | 0.048244013 | 0.035060758 | 0.043337477 | 0.024195564 | 0.026251633 | 0.039249687  | 0.029477667 | 0.040648257 | 0.181132515 | 1.234267416 | 0.693788 |
| L-Tyrosine                                      | 182.0800443 | 314.653  | 0.015186635 | 0.027974429 | 0.015699913 | 0.035542323 | 0.039356015 | 0.02267599  | 0.014253616 | 0.012030291 | 0.031700838 | 0.021338597  | 0.015969337 | 0.018227149 | 0.184396057 | 1.378043887 | 0.902728 |
| PC(22:0/24:1)                                   | 788.6077842 | 51.159   | 0.0128602   | 0.032340058 | 0.010297796 | 0.024518664 | 0.017446841 | 0.014533287 | 0.011090439 | 0.013352435 | 0.013310026 | 0.016484946  | 0.016349606 | 0.011397954 | 0.185185487 | 1.36605832  | 0.859369 |
| SM(d18:1/12:0)                                  | 707.2188786 | 488.155  | 0.024035145 | 0.036072534 | 0.034496797 | 0.030255654 | 0.029317792 | 0.029998463 | 0.018118855 | 0.019739235 | 0.034758804 | 0.028633383  | 0.024850169 | 0.031182285 | 0.188875629 | 1.170989236 | 0.758817 |
| 3-Methylhistidine                               | 170.0918612 | 370.244  | 0.237917657 | 0.325470588 | 0.189319863 | 0.298386061 | 0.372327292 | 0.271899455 | 0.111675948 | 0.216758943 | 0.339902799 | 0.254718079  | 0.198354152 | 0.235950094 | 0.192624873 | 1.248983982 | 0.815657 |
| PC(18:3/16:1)                                   | 375.2228761 | 430.756  | 0.001685554 | 0.021073753 | 0.036679299 | 0.019932242 | 0.016215618 | 0.022172202 | 0.019810965 | 0.00930636  | 0.010997196 | 0.013995522  | 0.010984877 | 0.012564262 | 0.197253606 | 1.516352155 | 0.415634 |
| Kinetin                                         | 279.0934101 | 359.467  | 0.053715229 | 0.095695662 | 0.066364752 | 0.049317914 | 0.084720673 | 0.067686717 | 0.062669468 | 0.058365322 | 0.058582368 | 0.070144803  | 0.052325591 | 0.05057011  | 0.197780357 | 1.183870342 | 0.795654 |
| Decanoyl-L-carnitine                            | 316.2476244 | 174.993  | 0.000627471 | 0.014213826 | 0.008515484 | 0.008074327 | 0.009704124 | 0.010339116 | 0.001304213 | 0.002208507 | 0.011333643 | 0.006816165  | 0.003275422 | 0.006837387 | 0.198244784 | 1.619946564 | 0.738603 |
| Biliverdin                                      | 583.2526295 | 223.5045 | 0.017147394 | 0.009426591 | 0.022559253 | 0.011750071 | 0.012337778 | 0.012883762 | 0.021511183 | 0.009717532 | 0.035951452 | 0.020695955  | 0.013408473 | 0.018513657 | 0.207546393 | 0.718744911 | 0.473029 |
| TG(18:0/20:3n6/14:1)                            | 638.6284843 | 31.914   | 0.000808155 | 0.003557978 | 0.000824325 | 0.001883895 | 0.002604312 | 0.002475127 | 0.001068241 | 0.001844926 | 0.001233134 | 0.001649772  | 0.001449928 | 0.001228683 | 0.209150211 | 1.434129225 | 0.819377 |
| SM(d18:0/16:1)                                  | 222.0190472 | 150.43   | 0.026632681 | 0.040476624 | 0.052307048 | 0.06495114  | 0.048212826 | 0.02914227  | 0.003188441 | 0.001876201 | 0.002688525 | 0.0036748631 | 0.041006534 | 0.005872101 | 0.214171014 | 1.253059507 | 0.82094  |
| gamma-L-Glutamyl-L-valine                       | 229.1178313 | 228.384  | 0.002670146 | 0.006150982 | 0.002319599 | 0.003904942 | 0.004802978 | 0.004591724 | 0.000894649 | 0.003372162 | 0.004007063 | 0.00335342   |             |             |             |             |          |

|                                         |             |          |             |             |             |             |             |              |             |             |             |             |              |             |             |             |          |
|-----------------------------------------|-------------|----------|-------------|-------------|-------------|-------------|-------------|--------------|-------------|-------------|-------------|-------------|--------------|-------------|-------------|-------------|----------|
| His-Phe                                 | 267.1195302 | 232.9785 | 0.019932416 | 0.003026494 | 0.016115522 | 0.010544796 | 0.0052289   | 0.008282342  | 0.007756985 | 0.010258864 | 0.00090487  | 0.008045204 | 0.008045469  | 0.007246376 | 0.264357862 | 1.493937635 | 0.745031 |
| PIP3(16:0/16:0)                         | 365.1049772 | 400.8575 | 7.590682641 | 5.091373792 | 7.755164704 | 4.941315676 | 4.28893859  | 5.204312668  | 5.716290587 | 2.49020885  | 6.484305096 | 5.405898845 | 3.739604969  | 5.050136335 | 0.265623111 | 1.207202494 | 0.721915 |
| Behenic acid                            | 358.3676411 | 50.504   | 0.019001704 | 0.077916892 | 0.04551062  | 0.051322708 | 0.06914455  | 0.058206908  | 0.076635112 | 0.050935121 | 0.069318356 | 0.056892784 | 0.063523574  | 0.068753002 | 0.267780183 | 0.831749179 | 0.900371 |
| Sebacic acid                            | 244.1546849 | 48.235   | 0.002300156 | 0.005962316 | 0.000876414 | 0.002426826 | 0.003987321 | 0.0022736267 | 0.000952752 | 0.011484781 | 0.001350622 | 0.00382297  | 0.008302608  | 0.005091985 | 0.270441148 | 0.589868617 | 0.509564 |
| PC(o-18:0/18:0)                         | 720.5392914 | 31.903   | 0.001662535 | 0.010199044 | 0.004474539 | 0.004845626 | 0.00822481  | 0.004014283  | 0.002677027 | 0.00722055  | 0.005760498 | 0.004822399 | 0.002955923  | 0.004868394 | 0.270667633 | 1.404577663 | 0.865718 |
| TG(24:0/22:0/22:2)                      | 510.3529533 | 171.5415 | 0.001136563 | 0.011048627 | 0.002069912 | 0.010369718 | 0.009259529 | 0.005963635  | 0.003573755 | 0.006444017 | 0.001531917 | 0.004777053 | 0.006037026  | 0.004234228 | 0.271003415 | 1.49815738  | 0.626244 |
| PE(20:3/18:3)                           | 576.3396864 | 33.1625  | 0.001881187 | 0.003873394 | 0.001358298 | 0.00160788  | 0.002464836 | 0.002304489  | 0.001351161 | 0.001294359 | 0.002312627 | 0.002190401 | 0.001188517  | 0.002211333 | 0.276077708 | 1.278875143 | 0.844884 |
| Indole-2-carboxylic acid                | 162.0542627 | 29.635   | 0.154117405 | 0.334808213 | 0.106117405 | 0.194950227 | 0.29582545  | 0.171718658  | 0.16814731  | 0.109792509 | 0.192002111 | 0.193640346 | 0.168513038  | 0.163853812 | 0.277140311 | 1.262652203 | 0.858583 |
| TG(24:1/22:2/24:1)                      | 460.1467059 | 390.976  | 0.011181034 | 0.003979416 | 0.013940459 | 0.010570531 | 0.006756238 | 0.009877572  | 0.006059834 | 0.005947915 | 0.011629023 | 0.008215949 | 0.005732595  | 0.00706009  | 0.280652317 | 1.261165595 | 0.681128 |
| TG(20:0/14:0/o-18:0)                    | 689.170922  | 364.88   | 0.003635303 | 0.005358414 | 0.004610103 | 0.005135089 | 0.00603547  | 0.004928424  | 0.003016262 | 0.002489235 | 0.005387679 | 0.004042755 | 0.003942215  | 0.006277633 | 0.28276377  | 1.180754649 | 0.714122 |
| 1-Palmitoyl-sn-glycero-3-phosphocholine | 496.3380072 | 173.537  | 0.050973574 | 0.316782893 | 0.075045883 | 0.213574605 | 0.203053269 | 0.135500358  | 0.127424405 | 0.162395776 | 0.051404737 | 0.141382087 | 0.123967947  | 0.09274816  | 0.282769322 | 1.422705134 | 0.658148 |
| Chlorpromazine                          | 382.1184862 | 363.4945 | 0.0008864   | 0.010706797 | 0.006624731 | 0.005445506 | 0.009565199 | 0.007028977  | 0.001021514 | 0.005952906 | 0.005497147 | 0.005390225 | 0.005879694  | 0.0055692   | 0.283967965 | 1.373478942 | 0.655231 |
| Diaminopimelic acid                     | 208.1317468 | 45.4885  | 0.00386475  | 0.005962891 | 0.002474969 | 0.00412032  | 0.005750728 | 0.003495934  | 0.003152565 | 0.00430439  | 0.002761893 | 0.003802552 | 0.003645673  | 0.004032515 | 0.29368926  | 1.182952967 | 0.643784 |
| PE(20:1/P-18:0)                         | 650.5020859 | 31.692   | 0.013786016 | 0.029680081 | 0.020203267 | 0.00982731  | 0.027698938 | 0.019793086  | 0.016369774 | 0.022196162 | 0.005707247 | 0.016554869 | 0.018064596  | 0.016542516 | 0.294331537 | 1.267758056 | 0.357771 |
| 2-Oxoadipic acid                        | 338.107279  | 142.08   | 0.024892654 | 0.075943653 | 0.023348748 | 0.042833473 | 0.046564021 | 0.039262034  | 0.041291397 | 0.033961743 | 0.024150787 | 0.038919665 | 0.029142917  | 0.031531199 | 0.299905075 | 1.270590428 | 0.766823 |
| Glycerol 1-myristate                    | 325.2364627 | 47.653   | 0.018378254 | 0.048304824 | 0.035671928 | 0.033626442 | 0.038583805 | 0.032308652  | 0.034126035 | 0.067948012 | 0.027368445 | 0.036763647 | 0.049402594  | 0.037577195 | 0.304402729 | 0.81708295  | 0.733697 |
| TG(24:0/24:1/20:3n6)                    | 731.1788435 | 404.348  | 0.018667534 | 0.061835437 | 0.040668493 | 0.038071659 | 0.033873932 | 0.037764164  | 0.033687181 | 0.043544934 | 0.021171971 | 0.035735908 | 0.043464448  | 0.027827438 | 0.360002159 | 1.223720388 | 0.574363 |
| N-Acetyl-L-tyrosine                     | 268.0512058 | 317.232  | 0.039499746 | 0.023523457 | 0.060077963 | 0.03441518  | 0.025956878 | 0.029359454  | 0.03431501  | 0.030160702 | 0.073736479 | 0.040938457 | 0.033927108  | 0.056662957 | 0.306979392 | 0.789026898 | 0.546902 |
| Monoethylglycylxlyidide (MEGX)          | 245.1057465 | 321.783  | 0.062980916 | 0.025980542 | 0.067652436 | 0.032500869 | 0.038787371 | 0.048471978  | 0.037364138 | 0.039193127 | 0.104838537 | 0.055366238 | 0.062171031  | 0.054463666 | 0.31427151  | 0.782050548 | 0.546613 |
| Ile-Cys                                 | 252.1432486 | 371.5275 | 0.012421965 | 0.025666116 | 0.008635574 | 0.024226914 | 0.015308363 | 0.015875608  | 0.01345167  | 0.013086346 | 0.014403649 | 0.01271611  | 0.011463194  | 0.017492368 | 0.316926848 | 1.213448379 | 0.699816 |
| trans-2-Hydroxycinnamic acid            | 165.0538155 | 290.757  | 0.022181507 | 0.02694185  | 0.015264243 | 0.014548458 | 0.030082818 | 0.022698983  | 0.012399078 | 0.01498593  | 0.026640177 | 0.01297404  | 0.016796645  | 0.019227486 | 0.321747958 | 1.182952304 | 0.700645 |
| Asn-Ala                                 | 248.0634098 | 177.548  | 0.00970856  | 0.004950208 | 0.002684554 | 0.004657643 | 0.003732297 | 0.00571174   | 0.003298048 | 0.002258155 | 0.006148828 | 0.00523464  | 0.003331388  | 0.004228288 | 0.337088916 | 1.283503679 | 0.628635 |
| Erucamide                               | 338.3415805 | 35.2025  | 0.474503298 | 0.755786779 | 0.824116573 | 0.732778869 | 0.600729157 | 0.843793408  | 1.139472555 | 0.647671388 | 0.739018056 | 0.75030623  | 0.758065186  | 0.746373522 | 0.339663544 | 0.885126638 | 0.485288 |
| TG(15:0/18:0/22:2)                      | 202.0046749 | 231.7045 | 0.325207677 | 0.360118582 | 0.321039932 | 0.278069146 | 0.304442763 | 0.301978321  | 0.324573419 | 0.302795176 | 0.308907965 | 0.324147911 | 0.273154643  | 0.266303211 | 0.342707231 | 1.050544469 | 0.580102 |
| Pectin (Galacturonic acid)              | 258.0543221 | 418.236  | 0.242098559 | 0.001301165 | 0.216367034 | 0.164649532 | 0.058504573 | 0.124960659  | 0.165527883 | 0.151779415 | 0.194957082 | 0.15902059  | 0.169957238  | 0.193863291 | 0.348258356 | 0.780482301 | 0.77449  |
| 3.alpha.-Mannobiose                     | 325.1129527 | 51.844   | 0.000814923 | 0.007549372 | 0.005287698 | 0.005295189 | 0.004904998 | 0.005213379  | 0.004818232 | 0.004084974 | 0.003749838 | 0.00431041  | 0.003806369  | 0.002796451 | 0.351447008 | 1.23335403  | 0.595634 |
| Phe-Arg                                 | 322.1867095 | 304.493  | 0.000903055 | 0.004189213 | 0.022850524 | 0.007246068 | 0.004923094 | 0.006599514  | 0.008574672 | 0.002053854 | 0.002969101 | 0.005059811 | 0.003561566  | 0.005277402 | 0.35267753  | 1.698820857 | 0.219373 |
| Betaine                                 | 118.0863499 | 264.6785 | 0.397778943 | 0.486500893 | 0.361747491 | 0.428665713 | 0.670474479 | 0.490396854  | 0.354087875 | 0.284918145 | 0.553474443 | 0.452512197 | 0.344371144  | 0.490287019 | 0.353153494 | 1.143533601 | 0.758392 |
| TG(14:0/20:2n6/18:0)                    | 542.4396713 | 32.4725  | 0.012017736 | 0.0282876   | 0.014159294 | 0.016817807 | 0.022809153 | 0.023647839  | 0.005746031 | 0.009320608 | 0.027984831 | 0.017467301 | 0.011224801  | 0.02191806  | 0.370494861 | 1.257072149 | 0.779144 |
| PE(18:1/15:0)                           | 614.2462358 | 474.0275 | 0.001642581 | 0.00301812  | 0.005367069 | 0.002965013 | 0.002614752 | 0.002470791  | 0.002195514 | 0.000921802 | 0.003829296 | 0.00271353  | 0.001411541  | 0.003223261 | 0.376000315 | 1.264665745 | 0.558465 |
| PC(16:0/16:0)                           | 778.538746  | 50.532   | 0.002233068 | 0.0051532   | 0.002132607 | 0.004910768 | 0.004686695 | 0.003769253  | 0.002313381 | 0.003167934 | 0.002803373 | 0.003074028 | 0.003528008  | 0.004534893 | 0.38143211  | 1.178356622 | 0.729004 |
| TG(15:0/18:0/22:2)                      | 490.1573254 | 425.518  | 0.037626815 | 0.030259722 | 0.049794845 | 0.02797884  | 0.024970437 | 0.028691415  | 0.016932242 | 0.027480774 | 0.049215235 | 0.034808079 | 0.0022758342 | 0.031299599 | 0.386698951 | 1.178892449 | 0.539151 |
| Marmesin                                | 247.0971434 | 46.854   | 0.001918072 | 0.002856375 | 0.002557899 | 0.00185105  | 0.002858578 | 0.002752954  | 0.000691511 | 0.004896509 | 0.002837742 | 0.002540952 | 0.003015497  | 0.004186651 | 0.38792837  | 0.814301303 | 0.337569 |
| Pro-Thr                                 | 283.0619181 | 322.5165 | 0.048365416 | 0.018456689 | 0.059001956 | 0.047941735 | 0.035859813 | 0.031890945  | 0.026222927 | 0.029613618 | 0.098618697 | 0.049078793 | 0.040644701  | 0.063831833 | 0.394513277 | 0.784117749 | 0.354689 |
| PS(18:0/20:0)                           | 480.1513097 | 465.5255 | 0.068633459 | 0.072108757 | 0.008545809 | 0.034469686 | 0.074914049 | 0.055066957  | 0.002752679 | 0.050349374 | 0.055368524 | 0.046896893 | 0.052939956  | 0.034990246 | 0.401207124 | 1.289526178 | 0.461536 |
| SM(d18:0/14:0)                          | 516.3702961 | 32.9655  | 0.028472792 | 0.041516959 | 0.002525436 | 0.027999481 | 0.040356288 | 0.02231652   | 0.002049632 | 0.010421555 | 0.04307497  | 0.025473556 | 0.016135861  | 0.023943108 | 0.412597266 | 1.143557821 | 0.592378 |
| epsilon-Caprolactam                     | 114.0901415 | 85.835   | 0.001533162 | 0.003413244 | 0.004104611 | 0.00415532  | 0.003098815 | 0.002990702  | 0.001399124 | 0.003060253 | 0.003921557 | 0.002716207 | 0.003111391  | 0.00241735  | 0.412963184 | 1.1605913   | 0.480512 |
| Val-Met                                 | 213.1038967 | 365.464  | 0.002431569 | 0.004101719 | 0.000709413 | 0.001406669 | 0.003922511 | 0.00269933   | 0.002194446 | 0.002763488 | 0.00054733  | 0.002033521 | 0.002281647  | 0.002226835 | 0.413266999 | 1.267607915 | 0.326112 |
| Triethanolamine                         | 150.1118811 | 171.466  | 0.0146087   | 0.0240041   | 0.015743419 | 0.020778985 | 0.031363334 | 0.015531499  | 0.029020932 | 0.021694759 | 0.024662299 | 0.023322526 | 0.019980367  | 0.018399421 | 0.433280997 | 0.890208392 | 0.672261 |
| Phenelzine                              | 159.0910903 | 248.294  | 0.005597334 | 0.022824573 | 0.007447796 | 0.015456936 | 0.024060728 | 0.013571783  | 0.012343559 | 0.00857142  | 0.017576037 | 0.012545686 | 0.01054628   | 0.011392997 | 0.444804139 | 1.219019617 | 0.846223 |
| Tolazoline                              | 160.0956933 | 285.471  | 0.002841728 | 0.006354857 | 0.003518328 | 0.005723714 | 0.007910868 | 0.005006696  | 0.003224133 | 0.002114318 | 0.008023825 | 0.004839051 | 0.003148027  | 0.004586986 | 0.445908368 | 1.208967456 | 0.812947 |
| Imidazole                               | 129.0653337 | 355.984  | 0.031039497 | 0.039086251 | 0.035586827 | 0.035357129 | 0.034903034 | 0.038185669  | 0.022359723 | 0.026562394 | 0.042449916 | 0.03270048  | 0.035426168  | 0.039190983 | 0.453836004 | 1.077853788 | 0.551402 |
| Ile-Leu                                 | 227.1747061 | 42.5725  | 0.008652881 | 0.012056909 | 0.025946186 | 0.015458587 | 0.065414931 | 0.010425431  | 0.015127231 | 0.006609619 | 0.019815385 | 0.012644629 | 0.00832169   | 0.031636424 | 0.45658064  | 1.235558783 | 0.525471 |
| His-Pro                                 | 235.1180534 | 141.878  | 0.013099535 | 0.022822749 | 0.006534122 | 0.016595057 | 0.022204421 | 0.012787842  | 0.00597409  | 0.019794987 | 0.031154781 | 0.018040253 | 0.020271583  | 0.017661556 | 0.46582211  | 0.          |          |

|                                      |             |          |             |             |             |             |             |             |             |             |              |             |             |             |             |             |          |
|--------------------------------------|-------------|----------|-------------|-------------|-------------|-------------|-------------|-------------|-------------|-------------|--------------|-------------|-------------|-------------|-------------|-------------|----------|
| Tyr-Met                              | 379.0622635 | 243.706  | 0.048100893 | 0.096854308 | 0.098661417 | 0.071567542 | 0.087322454 | 0.088693038 | 0.080706854 | 0.083890133 | 0.090262705  | 0.08373629  | 0.09111575  | 0.087432093 | 0.600026551 | 0.949831804 | 0.6828   |
| L-Glutamate                          | 148.0601477 | 391.5385 | 0.112906746 | 0.138573067 | 0.11496538  | 0.093017794 | 0.133752266 | 0.086904255 | 0.088501837 | 0.094204565 | 0.139759134  | 0.117710859 | 0.099285943 | 0.103569241 | 0.6011054   | 1.057676684 | 0.521666 |
| Arg-Gln                              | 303.1765634 | 423.345  | 0.002287941 | 0.003638964 | 0.008243015 | 0.006036398 | 0.004049473 | 0.003689786 | 0.008789908 | 0.004442299 | 0.003717833  | 0.004648161 | 0.004570665 | 0.00524803  | 0.623163212 | 0.889507894 | 0.382438 |
| Phe-Lys                              | 294.1812155 | 321.103  | 0.001202746 | 0.000750366 | 0.008748524 | 0.003521978 | 0.002326011 | 0.002896542 | 0.007596188 | 0.002645415 | 0.001517065  | 0.003208953 | 0.003685247 | 0.00524049  | 0.625275805 | 0.813873337 | 0.566872 |
| Caproic acid                         | 158.1168666 | 46.964   | 0.004150512 | 0.012495208 | 0.006224356 | 0.008773132 | 0.013438874 | 0.009128207 | 0.007883599 | 0.010157289 | 0.009085043  | 0.008441286 | 0.010961388 | 0.012074074 | 0.655129785 | 0.925047966 | 0.888137 |
| L-Iditol                             | 387.1546413 | 405.668  | 0.004443485 | 0.007304048 | 0.009867439 | 0.006852646 | 0.007292373 | 0.007461303 | 0.00495593  | 0.008423044 | 0.006022926  | 0.00641031  | 0.008010983 | 0.007010674 | 0.660739962 | 1.058466836 | 0.238078 |
| DL-Indole-3-lactic acid              | 188.0701535 | 247.908  | 0.021574578 | 0.072484993 | 0.027052911 | 0.025949854 | 0.076284771 | 0.065974289 | 0.046113074 | 0.030819175 | 0.0835777196 | 0.049750202 | 0.043903723 | 0.070572835 | 0.663912886 | 0.890942838 | 0.759178 |
| Beta.-Cyano-L-alanine                | 175.0707065 | 213.4375 | 0.015310895 | 0.018427055 | 0.014933709 | 0.015301587 | 0.021214542 | 0.012832046 | 0.014212686 | 0.01646045  | 0.02363969   | 0.017427485 | 0.01815076  | 0.013073795 | 0.680672953 | 0.951973598 | 0.461358 |
| PE(P-18:1/18:2)                      | 504.1179683 | 430.068  | 0.003638948 | 0.003818201 | 0.006733084 | 0.002523153 | 0.002873795 | 0.004650544 | 0.002698979 | 0.003504173 | 0.003753836  | 0.003763056 | 0.004239714 | 0.004573488 | 0.681783246 | 1.075642852 | 0.21238  |
| N6-Methyl-L-lysine                   | 161.1281999 | 511.192  | 0.013644657 | 0.034809931 | 0.025485088 | 0.024545995 | 0.049333827 | 0.026074566 | 0.010564834 | 0.026225962 | 0.03874968   | 0.025316982 | 0.030433782 | 0.026956666 | 0.68185822  | 1.098871185 | 0.650265 |
| Homovanillic acid                    | 200.0927926 | 310.901  | 0.001248658 | 0.000792701 | 0.002520888 | 0.001321102 | 0.001279537 | 0.001253494 | 0.001748056 | 0.000778227 | 0.001928367  | 0.00151003  | 0.000928691 | 0.002369863 | 0.689324371 | 0.908579012 | 0.273388 |
| L-Carnosine                          | 453.2163869 | 415.386  | 0.001021364 | 0.000968881 | 0.001801329 | 0.000920931 | 0.001272231 | 0.000913636 | 0.000703788 | 0.00133775  | 0.001035232  | 0.001116876 | 0.001138328 | 0.001174492 | 0.701150874 | 1.060233313 | 0.1363   |
| Indole-3-pyruvic acid                | 264.0920459 | 378.54   | 0.004085123 | 0.00845137  | 0.001809802 | 0.002947214 | 0.008092361 | 0.005849753 | 0.004667257 | 0.004088044 | 0.005201882  | 0.005084991 | 0.004481005 | 0.005048128 | 0.701800189 | 1.093251457 | 0.625095 |
| 3'-O-methylguanosine                 | 358.1338121 | 243.174  | 0.029693057 | 0.041309235 | 0.030508488 | 0.027468482 | 0.027627817 | 0.026591792 | 0.025115013 | 0.025729161 | 0.033220588  | 0.029776947 | 0.030249266 | 0.032956521 | 0.706554064 | 1.034744208 | 0.453908 |
| D-(+)-Melibiose                      | 343.1236001 | 434.094  | 0.135283293 | 0.235784846 | 0.147668621 | 0.240602217 | 0.231692789 | 0.129645093 | 0.211719072 | 0.158221607 | 0.211989283  | 0.18745778  | 0.173941835 | 0.229507064 | 0.732659033 | 0.955526814 | 0.649172 |
| Ethionamide                          | 184.0899034 | 321.103  | 0.008120978 | 0.005597445 | 0.011076436 | 0.004430011 | 0.012039716 | 0.007157036 | 0.005186363 | 0.006041216 | 0.01433587   | 0.008607427 | 0.007182261 | 0.010790044 | 0.744558206 | 0.928628079 | 0.128999 |
| Phosphorylcholine                    | 184.0729281 | 520.217  | 0.04317433  | 0.069680969 | 0.036753539 | 0.076187298 | 0.077700481 | 0.051565689 | 0.058464938 | 0.071620607 | 0.037941698  | 0.053879596 | 0.063775323 | 0.05481193  | 0.782494176 | 1.042785512 | 0.455166 |
| 3,4-Dihydroxyphenylacetic acid       | 359.0689089 | 287.442  | 0.032488749 | 0.002300499 | 0.03645157  | 0.028083539 | 0.015600649 | 0.02591365  | 0.031547925 | 0.023149859 | 0.027423734  | 0.023839328 | 0.024825321 | 0.01850129  | 0.800462432 | 0.943405821 | 0.722278 |
| Myristoleic acid                     | 244.225298  | 132.3    | 0.003359707 | 0.011686709 | 0.041238328 | 0.010297594 | 0.023992104 | 0.019319745 | 0.00111032  | 0.03759728  | 0.012896075  | 0.014275264 | 0.020282851 | 0.012978699 | 0.812079602 | 1.108469285 | 0.238301 |
| Glutaric acid                        | 282.1175614 | 371.26   | 0.00432679  | 0.010595931 | 0.004191039 | 0.005598873 | 0.006617907 | 0.005253298 | 0.0047285   | 0.009338945 | 0.003735641  | 0.006080155 | 0.00803801  | 0.00649743  | 0.816747655 | 0.952240864 | 0.530185 |
| D-Mannose 1-phosphate                | 321.0570154 | 299.698  | 0.008421892 | 0.01752621  | 0.013869662 | 0.010464906 | 0.015794483 | 0.01227337  | 0.011083411 | 0.015917776 | 0.011722408  | 0.012123949 | 0.011901941 | 0.013415335 | 0.819270364 | 1.028697015 | 0.601647 |
| TG(22:0/16:1/18:4)                   | 849.3096625 | 415.0565 | 0.002815813 | 0.002050072 | 0.003017607 | 0.001701944 | 0.002214445 | 0.002071212 | 0.000920858 | 0.0029124   | 0.00250978   | 0.002278064 | 0.003030321 | 0.002727049 | 0.826589072 | 0.964712593 | 0.129295 |
| 3-Indoleacetoneitrile                | 220.0817132 | 250.894  | 0.001197819 | 0.014962781 | 0.003251728 | 0.006841036 | 0.012744092 | 0.00659211  | 0.00273911  | 0.015624338 | 0.003536999  | 0.00648829  | 0.013245669 | 0.007932788 | 0.831769299 | 0.919752811 | 0.711769 |
| Guanidoacetic acid                   | 100.0507275 | 194.2065 | 0.007439863 | 0.00866234  | 0.005560237 | 0.007202727 | 0.006890561 | 0.006776373 | 0.005246932 | 0.006926343 | 0.006927326  | 0.006878223 | 0.007244022 | 0.008537881 | 0.833112106 | 1.018471278 | 0.414294 |
| Pro-Trp                              | 324.1285862 | 484.5435 | 0.00570664  | 0.012826171 | 0.007951606 | 0.006680481 | 0.010478313 | 0.008045452 | 0.006955019 | 0.008284612 | 0.011791997  | 0.008983857 | 0.009647928 | 0.007558492 | 0.845616088 | 0.971191523 | 0.75474  |
| Harmin                               | 279.0479302 | 357.521  | 0.019892805 | 0.00406304  | 0.003573387 | 0.0089645   | 0.006664289 | 0.007422767 | 0.002172925 | 0.001991812 | 0.024380416  | 0.010791549 | 0.006726442 | 0.009150991 | 0.85640989  | 0.916084043 | 0.277683 |
| Raffinose                            | 504.1756941 | 418.928  | 0.004780636 | 0.002608011 | 0.009572064 | 0.004377001 | 0.004209966 | 0.005738328 | 0.002701484 | 0.00732048  | 0.005534191  | 0.004801367 | 0.006502843 | 0.005526884 | 0.87767866  | 0.965997637 | 0.460396 |
| Stearic acid                         | 302.3047211 | 80.576   | 0.028606259 | 0.090457782 | 0.034457551 | 0.072639637 | 0.056270878 | 0.066674762 | 0.103023655 | 0.040865081 | 0.024198786  | 0.055396013 | 0.043138118 | 0.070409661 | 0.894672225 | 1.035829178 | 0.391747 |
| 2',4'-Dihydroxyacetophenone          | 135.0470613 | 338.7665 | 0.03281387  | 0.088606367 | 0.013818282 | 0.027438896 | 0.089673973 | 0.053496251 | 0.061462789 | 0.045337306 | 0.045329249  | 0.053080184 | 0.059041032 | 0.032004457 | 0.9105209   | 1.03237961  | 0.605669 |
| L-Serine                             | 106.0495845 | 367.988  | 0.008212658 | 0.011490515 | 0.011455039 | 0.005243771 | 0.008712147 | 0.010162453 | 0.00658861  | 0.004899553 | 0.017114506  | 0.009668667 | 0.009346835 | 0.008980107 | 0.913035158 | 0.976647788 | 0.264636 |
| D-Lyxose                             | 150.0555785 | 116.758  | 0.036169921 | 0.075872428 | 0.026173551 | 0.035288528 | 0.050725544 | 0.055948983 | 0.022928096 | 0.025104058 | 0.09564033   | 0.046942965 | 0.046057704 | 0.050096681 | 0.934176675 | 0.977016833 | 0.610493 |
| TG(18:1/16:0/o-18:0)                 | 1146.704958 | 445.437  | 1.77E-05    | 0.001475789 | 0.005488283 | 1.34E-03    | 0.001375658 | 2.40E-03    | 0.002355846 | 0.001291813 | 0.001937523  | 0.001775628 | 0.001912551 | 0.002454187 | 0.938544485 | 1.031539585 | 0.6186   |
| TG(22:5/18:2/22:6)                   | 601.5162329 | 221.473  | 0.004574985 | 0.004325218 | 0.015375122 | 0.006123263 | 0.007930909 | 0.006932288 | 0.002987935 | 0.007724476 | 0.008843545  | 0.006556162 | 0.008752466 | 0.009546016 | 0.942879342 | 1.019166258 | 0.149261 |
| 1-Palmitoylglycerol                  | 313.2725554 | 35.818   | 0.038953665 | 0.117901442 | 0.052454901 | 0.079711253 | 0.071140335 | 0.07154052  | 0.071992328 | 0.076409465 | 0.051585824  | 0.070081657 | 0.082452396 | 0.084368426 | 0.944104592 | 0.988125206 | 0.695771 |
| 5-Fluoro-5'-Deoxyuridine             | 307.0875018 | 434.225  | 0.001153011 | 0.00738469  | 0.004416433 | 0.004983501 | 0.007097463 | 0.005114313 | 0.004446336 | 0.004735148 | 0.005515206  | 0.004572355 | 0.004818875 | 0.005766054 | 0.959384496 | 1.009896069 | 0.800736 |
| 1-Oleoyl-sn-glycero-3-phosphocholine | 522.3523715 | 171.789  | 0.020163038 | 0.161507376 | 0.026906043 | 0.132886286 | 0.10761517  | 0.07381867  | 0.040299942 | 0.177054274 | 0.013114229  | 0.07886727  | 0.145716346 | 0.057878861 | 0.962923835 | 1.019428856 | 0.435025 |
| Triphenyl phosphate                  | 327.0765973 | 405.059  | 0.067144515 | 0.032862835 | 0.080137844 | 0.034690766 | 0.040741177 | 0.077095343 | 0.055294199 | 0.047119848 | 0.070564736  | 0.058063287 | 0.04651615  | 0.056190936 | 0.985434053 | 0.996773996 | 0.540069 |
| His-Glu                              | 267.1072982 | 319.8455 | 0.003078175 | 0.007208496 | 0.004525603 | 0.00383476  | 0.005217792 | 0.003558568 | 0.001926635 | 0.005736697 | 0.005669231  | 0.004551889 | 0.0048709   | 0.004660071 | 0.998759215 | 1.000290749 | 0.54804  |
