# Supplementary figures and images for: Donkey milk inhibits triple-negative breast tumor progression and is associated with increased cleaved-caspase-3 expression
Source: Royal Society of Chemistry journal article supplement (doi:10.1039/c9fo02934f), 2020-01-01

### Figure Legends

**Fig. S1.** Donkey milk decreased the expression of CD31 and MMP2 in primary 4T1 tumor.

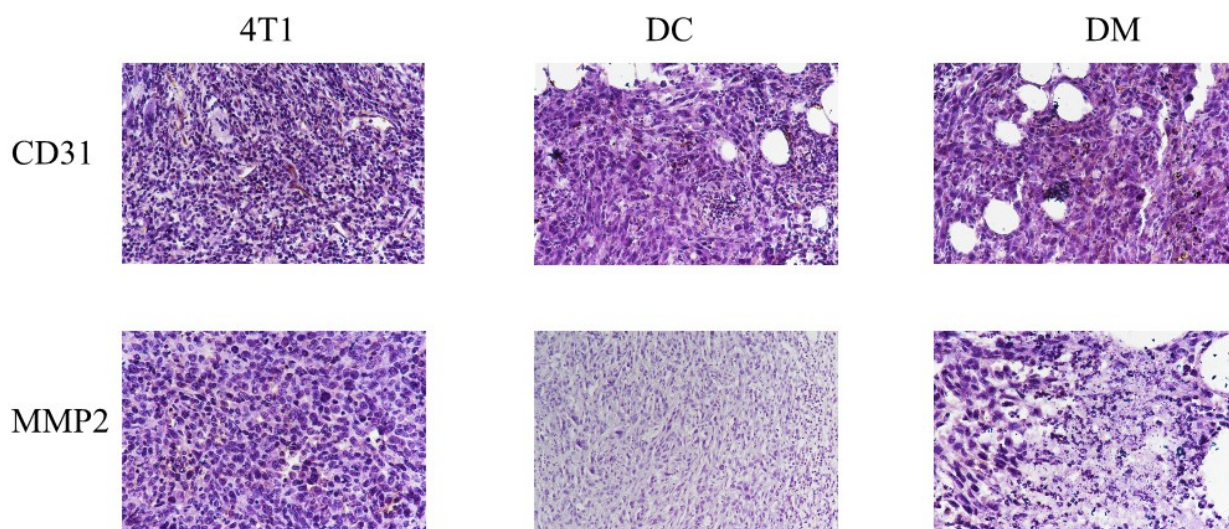

Supplement: c9fo02934f1.pdf [file c9fo02934f1.pdf]
